# Supplementary material
Source: PubMed Central journal article supplement (PMC8908479)
Supplement: NIHMS1782594-supplement-Supplementary_Material.pdf [file NIHMS1782594-supplement-Supplementary_Material.pdf]

## SUPPORTING INFORMATION

### Characterization of Per- and Polyfluorinated Alkyl Substances (PFAS) Present in Commercial Anti-Fog Products and Their In Vitro Adipogenic Activity

Nicholas J. Herkert<sup>1</sup>, Christopher D. Kassotis<sup>2</sup>, Sharon Zhang<sup>1</sup>, Yuling Han<sup>3</sup>, Vivek Francis Pulikkal<sup>3</sup>, Mei Sun<sup>3</sup>, P. Lee Ferguson<sup>1, 4</sup>, Heather M. Stapleton<sup>1\*</sup>

<sup>1</sup>Nicholas School of the Environment, Duke University, Box 90328, Durham, North Carolina 27708, United States

<sup>2</sup>Institute of Environmental Health Sciences and Department of Pharmacology, Wayne State University, Detroit, Michigan 48202, United States

<sup>3</sup>Department of Civil and Environmental Engineering, University of North Carolina at Charlotte, Charlotte, North Carolina 28223, United States

<sup>4</sup>Department of Civil and Environmental Engineering, Duke University, Durham, NC 27708, United States

#### Summary

The supporting information contains additional results for adipogenesis results (**Figure S1**); information about the anti-fog products (**Table S1**); chemical descriptors for PFAS compounds not observed in samples, including CAS number, IUPAC Name, SMILES, and INCHI-Key (**Table S2**); LC-MS summary results for ionic PFAS (**Table S3**); summary data for identified compounds, including molecular formulas, exact masses, observed massed and prevalent fragments (**Table S4**); chemical descriptors for identified PFAS compounds including CAS number, IUPAC Name, SMILES, and INCHI-Key (**Table S5**); average response ratios of identified compounds in the anti-fog products (**Table S6**); mean composition of 6:2 fluorotelomer ethoxymer distribution in commercial FTEO Mixture determined by HPLC-CAD analysis (**Table S7**); characteristics for the anti-fog sprays (**Table S8**); example results from HPLC-HRMS (**Figure S2 & Figure S3**); HPLC-CAD analysis of 6:2 FTEO mixture (**Figure S4**); GC-HRMS chromatograms for commercial FTEO mixtures (**Figure S5 & Figure S6**); and PCI spectra for identified compounds (**Figure S7 – Figure S52**). Clean PCI spectra were unable to be collected for 12:2 FTOH, 14:2 FTOH, 16:2 FTOH, all 14:2 FTEO compounds, and all 16:2 FTEO compounds due to low abundances or inferences.

## Additional Figures

### Anti-fog Solution and Component Adipogenesis Results

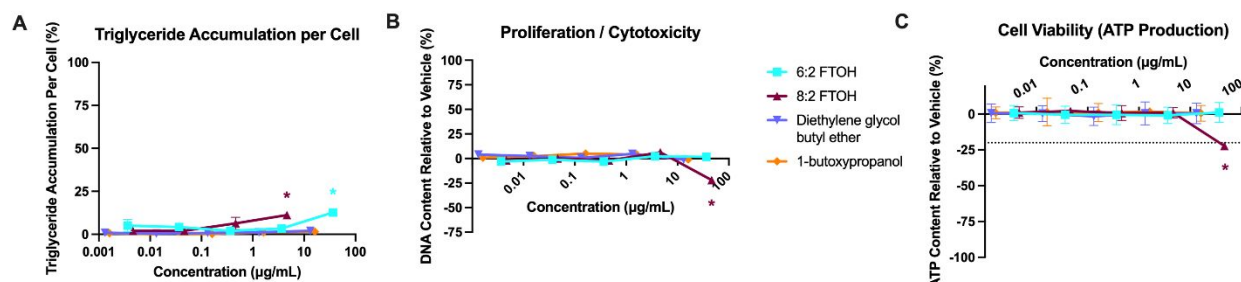

**Figure S1:** Adipogenesis results are presented for the two non-fluorinated additives (diethylene glycol butyl ether & 1-butoxypropanol) identified in anti-fog spray A. Percent triglyceride accumulation per cell (normalized to DNA content) in 3T3-L1 cells relative to maximal intra-assay response for rosiglitazone (left), increase (pre-adipocyte proliferation) or decrease (potential cytotoxicity) in DNA content relative to vehicle control (middle), increase or decrease in cell viability (ATP content) relative to vehicle control (right). Data presented as mean  $\pm$  SEM from three independent experiments.

### Additional Data Tables

**Table S1:** Summary information on the anti-fog products tested.

| <u>Product Type</u> | <u>Sample ID</u> | <u>Brand Name</u>       | <u>Ingredients Listed by the Manufacturer</u>                                              | <u>Comments</u> |
|---------------------|------------------|-------------------------|--------------------------------------------------------------------------------------------|-----------------|
| Anti-Fog Spray      | Spray A          | Gamer Advantage FogAway | fluoroaliphatic oxyethelene adduct, propyle glycol butyl ether, 2-(2-butoxyethoxy) ethanol | Made in USA     |
| Anti-Fog Spray      | Spray B          | Recoppa                 | Non-Toxic surfactant, kathon, water                                                        |                 |
| Anti-Fog Spray      | Spray C          | Splaqua                 | No ingredients listed                                                                      | Made in China   |
| Anti-Fog Spray      | Spray D          | Optix 55 Fog GONE       | No ingredients listed                                                                      | Made in USA     |
| Anti-Fog Cloth      | Cloth A          | Neatrition              | No ingredients listed                                                                      | Made in China   |
| Anti-Fog Cloth      | Cloth B          | LifeArt                 | No ingredients listed                                                                      |                 |
| Anti-Fog Cloth      | Cloth C          | EasyView                | No ingredients listed                                                                      | Made in Korea   |
| Anti-Fog Cloth      | Cloth D          | ROTUS                   | No ingredients listed                                                                      | Made in China   |
| Anti-Fog Cloth      | Cloth E          | EYENID                  | No ingredients listed                                                                      | Made in China   |



**Table S3:** LC results for ionic PFAS. The quantitated values are reported as mean (standard deviation) of triplicate measurements.

| COMPOUND NAME                 | Abbrev. | CONCENTRATION (NG/ML) |                 |                 |                 | CONCENTRATION (NG/G CLOTH) |                  |                   |                    |                   |
|-------------------------------|---------|-----------------------|-----------------|-----------------|-----------------|----------------------------|------------------|-------------------|--------------------|-------------------|
|                               |         | Spray A               | Spray B         | Spray C         | Spray D         | Cloth A                    | Cloth B          | Cloth C           | Cloth D            | Cloth E           |
| PERFLUOROBUTANOIC ACID        | PFBA    | 400.73<br>(202.67)    | 42.50<br>(1.64) | 11.72<br>(0.50) | 15.28<br>(2.15) | 48.38<br>(10.81)           | 62.75<br>(7.89)  | 129.12<br>(26.50) | 586.75<br>(141.72) | 150.45<br>(49.15) |
| PERFLUOROPENTANOIC ACID       | PFPeA   | -- (--)               | 12.63<br>(0.44) | -- (--)         | -- (--)         | 174.69<br>(22.12)          | -- (--)          | 121.15<br>(35.62) | 772.86<br>(168.79) | 267.54<br>(97.74) |
| PERFLUOROHEXANOIC ACID        | PFHxA   | 873.27<br>(83.18)     | 4.30<br>(0.22)  | 3.60<br>(0.42)  | 20.62<br>(0.65) | 161.07<br>(24.31)          | 25.09<br>(3.64)  | 123.47<br>(23.73) | 626.84<br>(169.22) | 195.03<br>(73.17) |
| PERFLUOROHEPTANOIC ACID       | PFHpA   | 36.22<br>(6.72)       | 1.05<br>(0.21)  | 0.77<br>(0.44)  | 0.41<br>(0.08)  | 776.96<br>(130.40)         | 62.87<br>(34.50) | 241.49<br>(74.79) | 635.07<br>(103.80) | 129.47<br>(42.29) |
| PERFLUOROOCCTANOIC ACID       | PFOA    | -- (--)               | -- (--)         | -- (--)         | -- (--)         | 594.26<br>(71.27)          | -- (--)          | 85.31<br>(96.98)  | -- (--)            | 31.92 (--<br>)    |
| PERFLUORONONANOIC ACID        | PFNA    | -- (--)               | -- (--)         | -- (--)         | -- (--)         | 69.89<br>(8.80)            | -- (--)          | -- (--)           | -- (--)            | -- (--)           |
| PERFLUORODECANOIC ACID        | PFDA    | -- (--)               | -- (--)         | -- (--)         | -- (--)         | 191.83<br>(28.40)          | 3.81 (--)        | -- (--)           | 0.82<br>(0.49)     | -- (--)           |
| PERFLUOROUNDECANOIC ACID      | PFUnA   | -- (--)               | -- (--)         | -- (--)         | -- (--)         | 13.62<br>(1.97)            | -- (--)          | -- (--)           | -- (--)            | -- (--)           |
| PERFLUORODODECANOIC ACID      | PFDoDA  | 7.00 (--)             | -- (--)         | -- (--)         | -- (--)         | 41.98<br>(3.98)            | 0.52<br>(0.22)   | -- (--)           | -- (--)            | 1.07<br>(0.20)    |
| PERFLUOROBUTANESULFONIC ACID  | PFBS    | -- (--)               | -- (--)         | -- (--)         | -- (--)         | -- (--)                    | -- (--)          | -- (--)           | -- (--)            | -- (--)           |
| PERFLUOROPENTANESULFONIC ACID | PFPeS   | 0.97<br>(0.76)        | 0.01<br>(0.02)  | 0.13<br>(0.19)  | 0.02<br>(0.00)  | 0.07<br>(0.06)             | 0.55<br>(0.10)   | 0.05<br>(0.04)    | 0.09<br>(0.06)     | 0.08<br>(0.06)    |
| PERFLUOROHEXANESULFONIC ACID  | PFHxS   | -- (--)               | 0.65 (--)       | -- (--)         | -- (--)         | -- (--)                    | -- (--)          | 4.13 (--)         | -- (--)            | -- (--)           |
| PERFLUOROHEPTANESULFONIC ACID | PFHpS   | 3.80<br>(1.31)        | 0.03<br>(0.04)  | -- (--)         | -- (--)         | 0.14 (--)                  | -- (--)          | 0.05 (--)         | 0.10<br>(0.02)     | 0.05<br>(0.02)    |
| PERFLUOROOCCTANESULFONIC ACID | PFOS    | -- (--)               | -- (--)         | 0.17<br>(0.07)  | 0.29<br>(0.22)  | 0.73<br>(0.33)             | -- (--)          | -- (--)           | -- (--)            | 0.40<br>(0.04)    |

|                                                                                 |                     |                 |                |                |                |                |                |                |                  |                  |
|---------------------------------------------------------------------------------|---------------------|-----------------|----------------|----------------|----------------|----------------|----------------|----------------|------------------|------------------|
| <b>PERFLUORONONANESULFONIC ACID</b>                                             | <b>PFNS</b>         | 1.77<br>(0.45)  | 0.01<br>(0.01) | 0.02<br>(0.01) | -- (--)        | 0.12<br>(0.10) | -- (--)        | -- (--)        | 0.10<br>(0.06)   | 0.11<br>(0.05)   |
| <b>PERFLUORODECANESULFONIC ACID</b>                                             | <b>PFDS</b>         | 5.60<br>(3.04)  | 0.03<br>(0.02) | 0.01 (--)      | -- (--)        | -- (--)        | -- (--)        | 0.32<br>(0.11) | 0.17<br>(0.11)   | 0.15<br>(0.05)   |
| <b>PERFLUORODODECANESULFONIC ACID</b>                                           | <b>PFDoS</b>        | 13.43<br>(9.87) | 0.05<br>(0.01) | -- (--)        | -- (--)        | -- (--)        | -- (--)        | -- (--)        | -- (--)          | -- (--)          |
| <b>PERFLUORO-2-PROPOXYPROPANOIC ACID</b>                                        | <b>GenX</b>         | -- (--)         | -- (--)        | -- (--)        | -- (--)        | -- (--)        | -- (--)        | -- (--)        | -- (--)          | -- (--)          |
| <b>4:2 FLUOROTELOMER SULFONIC ACID</b>                                          | <b>4:2 FTS</b>      | 3.28<br>(1.91)  | 0.09<br>(0.01) | 0.02<br>(0.00) | 0.03<br>(0.01) | 0.61<br>(0.05) | -- (--)        | 0.10<br>(0.01) | 0.41<br>(0.20)   | 0.25<br>(0.06)   |
| <b>6:2 FLUOROTELOMER SULFONIC ACID</b>                                          | <b>6:2 FTS</b>      | 19.23<br>(5.40) | -- (--)        | -- (--)        | -- (--)        | -- (--)        | -- (--)        | 0.93<br>(0.19) | 52.84<br>(13.45) | 0.14 (--)        |
| <b>SODIUM BIS(1H, 1H,2H,2H-PERFLUORODECYL) PHOSPHATE</b>                        | <b>8:2diPAP</b>     | -- (--)         | -- (--)        | -- (--)        | -- (--)        | -- (--)        | -- (--)        | -- (--)        | -- (--)          | -- (--)          |
| <b>SODIUM BIS(1H, 1H,2H,2H-PERFLUOROOCYL) PHOSPHATE</b>                         | <b>6:2diPAP</b>     | -- (--)         | -- (--)        | -- (--)        | -- (--)        | 0.97 (--)      | -- (--)        | -- (--)        | -- (--)          | -- (--)          |
| <b>SODIUM (1H, 1H,2H,2H-PERFLUOROOCYL-1H,1H,2H,2H-PERFLUORODECYL) PHOSPHATE</b> | <b>6:2/8:2diPAP</b> | -- (--)         | -- (--)        | -- (--)        | -- (--)        | 1.96<br>(0.96) | -- (--)        | -- (--)        | -- (--)          | -- (--)          |
| <b>3,3,4,4,5,5,6,6,7,7,8,8,8-TRIDECAFLUOROOCANOIC ACID</b>                      | <b>6:2 FTCA</b>     | -- (--)         | -- (--)        | -- (--)        | -- (--)        | -- (--)        | -- (--)        | -- (--)        | -- (--)          | -- (--)          |
| <b>2H,2H-PERFLUORODECANOIC ACID</b>                                             | <b>8:2 FTCA</b>     | -- (--)         | -- (--)        | -- (--)        | -- (--)        | -- (--)        | -- (--)        | -- (--)        | -- (--)          | -- (--)          |
| <b>2H,2H,3H,3H-PERFLUOROOCANOIC ACID</b>                                        | <b>5:3 FTCA</b>     | 5.33<br>(4.98)  | 0.34<br>(0.22) | 0.03<br>(0.02) | 0.04<br>(0.03) | 0.24<br>(0.26) | 0.61<br>(0.20) | 0.42<br>(0.20) | 2.41<br>(0.37)   | 48.25<br>(13.85) |
| <b>2H,2H,3H,3H-PERFLUORODECANOIC ACID</b>                                       | <b>7:3 FTCA</b>     | -- (--)         | 0.01<br>(0.00) | 0.03<br>(0.01) | -- (--)        | 6.77<br>(1.67) | 0.14<br>(0.00) | 0.11 (--)      | 0.13 (--)        | 0.13 (--)        |
| <b>PERFLUOROOCANESULFONAMIDOACETIC ACID</b>                                     | <b>FOSAA</b>        | -- (--)         | -- (--)        | 2.61<br>(1.16) | -- (--)        | 8.79 (--)      | -- (--)        | -- (--)        | -- (--)          | -- (--)          |

**Table S4:** Summary GC-HRMS data for all identified PFAS compounds in the anti-fog spray and cloth products analyzed including retention times, molecular formulas, exact masses, observed massed and prevalent fragments.

| Compound                                             | Retention Time | Formula     | Exact Mass  | Observed Mass | Fragment 1 | Fragment 2 | Fragment 3 | Fragment 4 | Fragment 5 |
|------------------------------------------------------|----------------|-------------|-------------|---------------|------------|------------|------------|------------|------------|
| <b>6:2FTOH</b>                                       | 10             | C8H5O1F13   | 364.013279  | 365.021104    | 327.004311 | na         | na         | na         | na         |
| <b>8:2FTOH</b>                                       | 11.91          | C10H5O1F17  | 464.006891  | 465.014716    | 426.997923 | na         | na         | na         | na         |
| <b>10:2FTOH</b>                                      | 13.49          | C12H5O1F21  | 564.000503  | 565.008328    | 526.991535 | na         | na         | na         | na         |
| <b>12:2-FTOH</b>                                     | 14.86          | C14H5O1F25  | 663.994115  | 665.00194     | 626.985147 | na         | na         | na         | na         |
| <b>14:2-FTOH</b>                                     | 15.89          | C16H5O1F29  | 763.987727  | 764.995552    | 726.978759 | na         | na         | na         | na         |
| <b>16:2-FTOH</b>                                     | 16.69          | C18H5O1F33  | 863.981339  | 864.989164    | 826.972371 | na         | na         | na         | na         |
| <b>6:2 - 6:2 FLOUROTELOMER ETHER</b>                 | 13.39          | C16H8O1F26  | 710.015993  | 711.023818    | 327.004311 | 377.021104 | na         | na         | na         |
| <b>6:2 - 8:2 FLOUROTELOMER ETHER</b>                 | 14.84          | C18H8O1F30  | 810.009605  | 811.01743     | 477.014716 | 426.997923 | na         | na         | na         |
| <b>8:2 - 8:2 FLOUROTELOMER ETHER</b>                 | 15.92          | C20H8O1F34  | 910.003217  | 911.011042    | 477.014716 | 426.997923 | 377.021104 | 327.004311 | na         |
| <b>8:2 - 10:2 FLOUROTELOMER ETHER</b>                | 16.72          | C22H8O1F38  | 1009.996829 | 1011.004654   | 577.008328 | 526.991535 | 477.014716 | 426.997923 | na         |
| <b>10:2 - 10:2 FLOUROTELOMER ETHER</b>               | 17.35          | C24H8O1F42  | 1109.990441 | 1011.004654   | 577.008328 | 526.991535 | na         | na         | na         |
| <b>1,4-BIS(1H,1H,2H,2H-PERFLUOROOCOTYL) FUMARATE</b> | 18.1           | C20H10O4F26 | 808.016388  | 809.024213    | 445.010934 | 365.021104 | 327.004311 | na         | na         |
| <b>6:2FTEO1</b>                                      | 13.3           | C10H9O2F13  | 408.039494  | 409.047319    | 327.004311 | 365.021104 | 391.036754 | na         | na         |
| <b>6:2FTEO2</b>                                      | 16.54          | C12H13O3F13 | 452.065709  | 453.073534    | 327.004311 | 365.021104 | 391.036754 | 435.062969 | na         |
| <b>6:2FTEO3</b>                                      | 18.43          | C14H17O4F13 | 496.091924  | 497.099749    | 327.004311 | 365.021104 | 391.036754 | 435.062969 | na         |
| <b>6:2FTEO4</b>                                      | 20.15          | C16H21O5F13 | 540.118139  | 541.125964    | 327.004311 | 365.021104 | 391.036754 | 435.062969 | 479.089184 |
| <b>6:2FTEO5</b>                                      | 21.92          | C18H25O6F13 | 584.144354  | 585.152179    | 327.004311 | 365.021104 | 391.036754 | 435.062969 | 479.089184 |
| <b>6:2FTEO6</b>                                      | 24.45          | C20H29O7F13 | 628.170569  | 629.178394    | 327.004311 | 365.021104 | 391.036754 | 435.062969 | 479.089184 |
| <b>6:2FTEO7</b>                                      | 29.75          | C22H33O8F13 | 672.196784  | 673.204609    | 327.004311 | 365.021104 | 391.036754 | 435.062969 | 479.089184 |
| <b>6:2FTEO8</b>                                      | 41.95          | C24H37O9F13 | 716.222999  | 717.230824    | 327.004311 | 365.021104 | 391.036754 | 435.062969 | 479.089184 |
| <b>6:2 - 6:2 FTEO1</b>                               | 16.06          | C18H12O2F26 | 754.042208  | 755.00903     | 327.004311 | 365.021104 | na         | na         | na         |
| <b>6:2 - 6:2 FTEO2</b>                               | 17.62          | C20H16O3F26 | 798.068423  | 799.03558     | 327.004311 | 365.021104 | 391.036754 | 435.062969 | na         |
| <b>6:2 - 6:2 FTEO3</b>                               | 18.87          | C22H20O4F26 | 842.094638  | 843.06177     | 327.004311 | 365.021104 | 391.036754 | 435.062969 | na         |
| <b>6:2 - 6:2 FTEO4</b>                               | 20             | C24H24O5F26 | 886.120853  | 887.08838     | 327.004311 | 365.021104 | 391.036754 | 435.062969 | 479.089184 |

|                        |       |             |             |            |            |            |            |            |            |
|------------------------|-------|-------------|-------------|------------|------------|------------|------------|------------|------------|
| <b>6:2 - 6:2 FTEO5</b> | 21.31 | C26H28O6F26 | 930.147068  | 931.11444  | 327.004311 | 365.021104 | 391.036754 | 435.062969 | 479.089184 |
| <b>6:2 - 6:2 FTEO6</b> | 22.74 | C28H32O7F26 | 974.173283  | 975.14063  | 327.004311 | 365.021104 | 391.036754 | 435.062969 | 479.089184 |
| <b>6:2 - 6:2 FTEO7</b> | 25.28 | C30H36O8F26 | 1018.199498 | 1019.16583 | 327.004311 | 365.021104 | 391.036754 | 435.062969 | 479.089184 |
| <b>6:2 - 6:2 FTEO8</b> | 30.69 | C32H40O9F26 | 1062.225713 | na         | 327.004311 | 365.021104 | 391.036754 | 435.062969 | na         |
| <b>8:2FTEO1</b>        | 14.36 | C12H9O2F17  | 508.033106  | 509.040931 | 426.997923 | 465.014716 | 491.030366 | na         | na         |
| <b>8:2FTEO2</b>        | 16.89 | C14H13O3F17 | 552.059321  | 553.067146 | 426.997923 | 465.014716 | 491.030366 | 535.056581 | na         |
| <b>8:2FTEO3</b>        | 18.56 | C16H17O4F17 | 596.085536  | 597.093361 | 426.997923 | 465.014716 | 491.030366 | 535.056581 | na         |
| <b>8:2FTEO4</b>        | 20.16 | C18H21O5F17 | 640.111751  | 641.119576 | 426.997923 | 465.014716 | 491.030366 | 535.056581 | 579.082796 |
| <b>8:2FTEO5</b>        | 21.84 | C20H25O6F17 | 684.137966  | 685.145791 | 426.997923 | 465.014716 | 491.030366 | 535.056581 | 579.082796 |
| <b>8:2FTEO6</b>        | 24.18 | C22H29O7F17 | 728.164181  | 729.172006 | 426.997923 | 465.014716 | 491.030366 | 535.056581 | 579.082796 |
| <b>8:2FTEO7</b>        | 29    | C24H33O8F17 | 772.190396  | 773.198221 | 426.997923 | 465.014716 | 491.030366 | 535.056581 | 579.082796 |
| <b>8:2FTEO8</b>        | 39.96 | C26H37O9F17 | 816.216611  | 817.224436 | 426.997923 | 465.014716 | 491.030366 | 535.056581 | 579.082796 |
| <b>10:2 FTEO1</b>      | 15.4  | C14H9O2F21  | 608.026718  | 609.034543 | 526.991535 | 565.008328 | 591.023978 | na         | na         |
| <b>10:2 FTEO2</b>      | 17.32 | C16H13O3F21 | 652.052933  | 653.060758 | 526.991535 | 565.008328 | 591.023978 | 635.050193 | na         |
| <b>10:2 FTEO3</b>      | 18.77 | C18H17O4F21 | 696.079148  | 697.086973 | 526.991535 | 565.008328 | 591.023978 | 635.050193 | na         |
| <b>10:2 FTEO4</b>      | 20.28 | C20H21O5F21 | 740.105363  | 741.113188 | 526.991535 | 565.008328 | 591.023978 | 635.050193 | 679.076408 |
| <b>10:2 FTEO5</b>      | 21.84 | C22H25O6F21 | 784.131578  | 785.139403 | 526.991535 | 565.008328 | 591.023978 | 635.050193 | 679.076408 |
| <b>10:2 FTEO6</b>      | 24.04 | C24H29O7F21 | 828.157793  | 829.165618 | 526.991535 | 565.008328 | 591.023978 | 635.050193 | 679.076408 |
| <b>10:2 FTEO7</b>      | 28.54 | C26H33O8F21 | 872.184008  | 873.191833 | 526.991535 | 565.008328 | 591.023978 | 635.050193 | 679.076408 |
| <b>10:2 FTEO8</b>      | 38.72 | C28H37O9F21 | 916.210223  | 917.218048 | 526.991535 | 565.008328 | 591.023978 | 635.050193 | 679.076408 |
| <b>12:2-FTEO1</b>      | 16.27 | C16H9O2F25  | 708.02033   | 709.028155 | 626.985147 | 665.00194  | 691.01759  | na         | na         |
| <b>12:2-FTEO2</b>      | 17.78 | C18H13O3F25 | 752.046545  | 753.05437  | 626.985147 | 665.00194  | 691.01759  | 735.043805 | na         |
| <b>12:2-FTEO3</b>      | 19.06 | C20H17O4F25 | 796.07276   | 797.080585 | 626.985147 | 665.00194  | 691.01759  | 735.043805 | na         |
| <b>12:2-FTEO4</b>      | 20.51 | C22H21O5F25 | 840.098975  | 841.1068   | 626.985147 | 665.00194  | 691.01759  | 735.043805 | 779.07002  |
| <b>12:2-FTEO5</b>      | 21.97 | C24H25O6F25 | 884.12519   | 885.133015 | 626.985147 | 665.00194  | 691.01759  | 735.043805 | 779.07002  |
| <b>12:2-FTEO6</b>      | 24.14 | C26H29O7F25 | 928.151405  | 929.15923  | 626.985147 | 665.00194  | 691.01759  | 735.043805 | 779.07002  |
| <b>12:2-FTEO7</b>      | 28.57 | C28H33O8F25 | 972.17762   | 973.185445 | 626.985147 | 665.00194  | 691.01759  | 735.043805 | 779.07002  |
| <b>12:2-FTEO8</b>      | 38.66 | C30H37O9F25 | 1016.203835 | 1017.21166 | 626.985147 | 665.00194  | 691.01759  | 735.043805 | 779.07002  |
| <b>14:2-FTEO1</b>      | 16.97 | C18H9O2F29  | 808.013942  | 809.021767 | 726.978759 | 764.995552 | 791.011202 | na         | na         |



|                   |       |             |             |             |            |            |            |            |            |
|-------------------|-------|-------------|-------------|-------------|------------|------------|------------|------------|------------|
| <b>14:2-FTEO2</b> | 18.25 | C20H13O3F29 | 852.040157  | 853.047982  | 726.978759 | 764.995552 | 791.011202 | 835.037417 | na         |
| <b>14:2-FTEO3</b> | 19.4  | C22H17O4F29 | 896.066372  | 897.074197  | 726.978759 | 764.995552 | 791.011202 | 835.037417 | na         |
| <b>14:2-FTEO4</b> | 20.81 | C24H21O5F29 | 940.092587  | 941.100412  | 726.978759 | 764.995552 | 791.011202 | 835.037417 | 879.063632 |
| <b>14:2-FTEO5</b> | 22.22 | C26H25O6F29 | 984.118802  | 985.126627  | 726.978759 | 764.995552 | 791.011202 | 835.037417 | 879.063632 |
| <b>14:2-FTEO6</b> | 24.38 | C28H29O7F29 | 1028.145017 | 1029.152842 | 726.978759 | 764.995552 | 791.011202 | 835.037417 | 879.063632 |
| <b>14:2-FTEO7</b> | 28.99 | C30H33O8F29 | 1072.171232 | 1073.179057 | 726.978759 | 764.995552 | 791.011202 | 835.037417 | 879.063632 |
| <b>14:2-FTEO8</b> | 39.46 | C32H37O9F29 | 1116.197447 | 1117.205272 | 726.978759 | 764.995552 | 791.011202 | 835.037417 | 879.063632 |
| <b>16:2-FTEO1</b> | 17.58 | C20H9O2F33  | 908.007554  | 909.015379  | 826.972371 | 864.989164 | 891.004814 | na         | na         |
| <b>16:2-FTEO2</b> | 18.72 | C22H13O3F33 | 952.033769  | 953.041594  | 826.972371 | 864.989164 | 891.004814 | 935.031029 | na         |
| <b>16:2-FTEO3</b> | 19.82 | C24H17O4F33 | 996.059984  | 997.067809  | 826.972371 | 864.989164 | 891.004814 | 935.031029 | na         |
| <b>16:2-FTEO4</b> | 21.15 | C26H21O5F33 | 1040.086199 | 1041.094024 | 826.972371 | 864.989164 | 891.004814 | 935.031029 | 979.057244 |
| <b>16:2-FTEO5</b> | 22.54 | C28H25O6F33 | 1084.112414 | 1085.120239 | 826.972371 | 864.989164 | 891.004814 | 935.031029 | 979.057244 |
| <b>16:2-FTEO6</b> | 25.09 | C30H29O7F33 | 1128.138629 | 1129.146454 | 826.972371 | 864.989164 | 891.004814 | 935.031029 | 979.057244 |
| <b>16:2-FTEO7</b> | 30.12 | C32H33O8F33 | 1172.164844 | 1173.172669 | 826.972371 | 864.989164 | 891.004814 | 935.031029 | 979.057244 |
| <b>16:2-FTEO8</b> | 41.68 | C34H37O9F33 | 1216.191059 | 1217.198884 | 826.972371 | 864.989164 | 891.004814 | 935.031029 | 979.057244 |







**Table S6:** Average response ratios (analyte response normalized to 13C 8:2 FTOH response) for all identified PFAS compounds in the anti-fog spray, anti-fog cloth products, and commercial mixtures analyzed via HR-GCMS analysis.

| COMPOUND                                     | SPRAY<br>A | SPRAY<br>B | SPRAY<br>C | SPRAY<br>D | CLOTH<br>A | CLOTH<br>B | CLOTH<br>C | CLOTH<br>D | CLOTH<br>E | FTEO<br>MIXTURE | ZONYL<br>FSN-100 |
|----------------------------------------------|------------|------------|------------|------------|------------|------------|------------|------------|------------|-----------------|------------------|
| 6:2FTOH                                      | 134,873    | 405        | 41         | 43         | 5          | 48         | 514        | 76         | 93         | 106             | 10               |
| 8:2FTOH                                      | --         | --         | --         | --         | 1,167      | --         | --         | --         | --         | --              | 7                |
| 10:2FTOH                                     | --         | --         | --         | --         | 483        | --         | --         | --         | --         | --              | 15               |
| 12:2-FTOH                                    | --         | --         | --         | --         | 33         | --         | --         | --         | --         | --              | 2                |
| 14:2-FTOH                                    | --         | --         | --         | --         | 2          | --         | --         | --         | --         | --              | 0                |
| 16:2-FTOH                                    | --         | --         | --         | --         | 0          | --         | --         | --         | --         | --              | 0                |
| 6:2 - 6:2 Flourotelomer Ether                | --         | 379        | 236        | 247        | 16         | 2,026      | 9,680      | 2,010      | 2,463      | 443             | 233              |
| 6:2 - 8:2 Flourotelomer Ether                | --         | --         | --         | --         | 14         | --         | --         | --         | --         | --              | 348              |
| 8:2 - 8:2 Flourotelomer Ether                | --         | --         | --         | --         | 810        | --         | --         | --         | --         | --              | 280              |
| 8:2 - 10:2 Flourotelomer Ether               | --         | --         | --         | --         | 135        | --         | --         | --         | --         | --              | 175              |
| 10:2 - 10:2 Flourotelomer Ether              | --         | --         | --         | --         | 20         | --         | --         | --         | --         | --              | 83               |
| 1,4-bis(1H,1H,2H,2H-Perfluorooctyl) fumarate | 48,896     | --         | --         | --         | --         | --         | --         | --         | --         | --              | --               |
| 6:2FTEO1                                     | 242        | 30         | 2          | 2          | 1          | 96         | 541        | 372        | 734        | 8               | 5                |
| 6:2FTEO2                                     | 1,225      | 57         | 10         | 10         | 0          | 131        | 876        | 1,622      | 1,915      | 26              | 1                |
| 6:2FTEO3                                     | 2,450      | 91         | 14         | 14         | 1          | 432        | 3,581      | 5,139      | 3,602      | 83              | 2                |
| 6:2FTEO4                                     | 4,905      | 90         | 42         | 40         | 5          | 1,478      | 16,054     | 16,437     | 6,825      | 270             | 7                |
| 6:2FTEO5                                     | 9,328      | 172        | 333        | 307        | 14         | 3,860      | 52,963     | 44,746     | 12,585     | 744             | 26               |
| 6:2FTEO6                                     | 8,333      | 165        | 198        | 196        | 9          | 4,237      | 50,900     | 44,630     | 12,399     | 853             | 41               |
| 6:2FTEO7                                     | 4,152      | 111        | 184        | 179        | 4          | 2,701      | 21,128     | 17,433     | 6,274      | 544             | 44               |
| 6:2FTEO8                                     | 193        | 68         | 146        | 148        | 1          | 1,467      | 9,524      | 8,402      | 3,429      | 282             | 46               |
| 6:2 - 6:2 FTEO1                              | --         | 6          | --         | --         | --         | --         | --         | 16         | 21         | --              | --               |
| 6:2 - 6:2 FTEO2                              | --         | 7          | --         | --         | --         | --         | --         | 54         | 68         | --              | --               |
| 6:2 - 6:2 FTEO3                              | --         | 11         | --         | --         | --         | --         | --         | 137        | 146        | --              | --               |
| 6:2 - 6:2 FTEO4                              | --         | 9          | --         | --         | --         | --         | --         | 150        | 183        | --              | --               |
| 6:2 - 6:2 FTEO5                              | --         | 13         | --         | --         | --         | --         | --         | 103        | 283        | --              | --               |

|                 |    |    |    |    |       |    |    |    |     |    |    |
|-----------------|----|----|----|----|-------|----|----|----|-----|----|----|
| 6:2 - 6:2 FTEO6 | -- | 11 | -- | -- | --    | -- | -- | 74 | 313 | -- | -- |
| 6:2 - 6:2 FTEO7 | -- | 5  | -- | -- | --    | -- | -- | 31 | 172 | -- | -- |
| 6:2 - 6:2 FTEO8 | -- | 0  | -- | -- | --    | -- | -- | 1  | 51  | -- | -- |
| 8:2FTEO1        | -- | -- | -- | -- | 252   | -- | -- | -- | --  | -- | 1  |
| 8:2FTEO2        | -- | -- | -- | -- | 403   | -- | -- | -- | --  | -- | 1  |
| 8:2FTEO3        | -- | -- | -- | -- | 950   | -- | -- | -- | --  | -- | 3  |
| 8:2FTEO4        | -- | -- | -- | -- | 2,079 | -- | -- | -- | --  | -- | 8  |
| 8:2FTEO5        | -- | -- | -- | -- | 4,086 | -- | -- | -- | --  | -- | 22 |
| 8:2FTEO6        | -- | -- | -- | -- | 3,485 | -- | -- | -- | --  | -- | 39 |
| 8:2FTEO7        | -- | -- | -- | -- | 1,689 | -- | -- | -- | --  | -- | 41 |
| 8:2FTEO8        | -- | -- | -- | -- | 695   | -- | -- | -- | --  | -- | 40 |
| 10:2 FTEO1      | -- | -- | -- | -- | 25    | -- | -- | -- | --  | -- | 0  |
| 10:2 FTEO2      | -- | -- | -- | -- | 65    | -- | -- | -- | --  | -- | 1  |
| 10:2 FTEO3      | -- | -- | -- | -- | 164   | -- | -- | -- | --  | -- | 2  |
| 10:2 FTEO4      | -- | -- | -- | -- | 421   | -- | -- | -- | --  | -- | 5  |
| 10:2 FTEO5      | -- | -- | -- | -- | 915   | -- | -- | -- | --  | -- | 14 |
| 10:2 FTEO6      | -- | -- | -- | -- | 455   | -- | -- | -- | --  | -- | 19 |
| 10:2 FTEO7      | -- | -- | -- | -- | 230   | -- | -- | -- | --  | -- | 22 |
| 10:2 FTEO8      | -- | -- | -- | -- | 127   | -- | -- | -- | --  | -- | 22 |
| 12:2-FTEO1      | -- | -- | -- | -- | 3     | -- | -- | -- | --  | -- | 0  |
| 12:2-FTEO2      | -- | -- | -- | -- | 9     | -- | -- | -- | --  | -- | 0  |
| 12:2-FTEO3      | -- | -- | -- | -- | 21    | -- | -- | -- | --  | -- | 1  |
| 12:2-FTEO4      | -- | -- | -- | -- | 49    | -- | -- | -- | --  | -- | 2  |
| 12:2-FTEO5      | -- | -- | -- | -- | 80    | -- | -- | -- | --  | -- | 6  |
| 12:2-FTEO6      | -- | -- | -- | -- | 136   | -- | -- | -- | --  | -- | 11 |
| 12:2-FTEO7      | -- | -- | -- | -- | 46    | -- | -- | -- | --  | -- | 11 |
| 12:2-FTEO8      | -- | -- | -- | -- | 25    | -- | -- | -- | --  | -- | 11 |
| 14:2-FTEO1      | -- | -- | -- | -- | 1     | -- | -- | -- | --  | -- | 0  |
| 14:2-FTEO2      | -- | -- | -- | -- | 1     | -- | -- | -- | --  | -- | 0  |

|            |    |    |    |    |    |    |    |    |    |    |   |
|------------|----|----|----|----|----|----|----|----|----|----|---|
| 14:2-FTEO3 | -- | -- | -- | -- | 3  | -- | -- | -- | -- | -- | 0 |
| 14:2-FTEO4 | -- | -- | -- | -- | 6  | -- | -- | -- | -- | -- | 1 |
| 14:2-FTEO5 | -- | -- | -- | -- | 9  | -- | -- | -- | -- | -- | 3 |
| 14:2-FTEO6 | -- | -- | -- | -- | 9  | -- | -- | -- | -- | -- | 4 |
| 14:2-FTEO7 | -- | -- | -- | -- | 6  | -- | -- | -- | -- | -- | 5 |
| 14:2-FTEO8 | -- | -- | -- | -- | 3  | -- | -- | -- | -- | -- | 5 |
| 16:2-FTEO1 | -- | -- | -- | -- | -- | -- | -- | -- | -- | -- | 0 |
| 16:2-FTEO2 | -- | -- | -- | -- | 0  | -- | -- | -- | -- | -- | 0 |
| 16:2-FTEO3 | -- | -- | -- | -- | 0  | -- | -- | -- | -- | -- | 0 |
| 16:2-FTEO4 | -- | -- | -- | -- | 1  | -- | -- | -- | -- | -- | 0 |
| 16:2-FTEO5 | -- | -- | -- | -- | 1  | -- | -- | -- | -- | -- | 1 |
| 16:2-FTEO6 | -- | -- | -- | -- | 0  | -- | -- | -- | -- | -- | 1 |
| 16:2-FTEO7 | -- | -- | -- | -- | 0  | -- | -- | -- | -- | -- | 2 |
| 16:2-FTEO8 | -- | -- | -- | -- | -- | -- | -- | -- | -- | -- | 1 |

**Table S7:** Mean composition of 6:2 FTEO ethoxymers in commercial FTEO Mixture determined by HPLC-CAD analysis.

| <b>COMPOUND</b>   | <b>MEAN % COMPOSITION<br/>IN FTEO MIXTURE (SD)</b> |
|-------------------|----------------------------------------------------|
| <b>6:2 FTEO1</b>  | N.A.                                               |
| <b>6:2 FTEO2</b>  | 0.08 (0.01)                                        |
| <b>6:2 FTEO3</b>  | 0.35 (0.07)                                        |
| <b>6:2 FTEO4</b>  | 3.77 (0.04)                                        |
| <b>6:2 FTEO5</b>  | 12.52 (0.35)                                       |
| <b>6:2 FTEO6</b>  | 16.45 (0.38)                                       |
| <b>6:2 FTEO7</b>  | 16.40 (0.32)                                       |
| <b>6:2 FTEO8</b>  | 14.24 (0.26)                                       |
| <b>6:2 FTEO9</b>  | 11.25 (0.24)                                       |
| <b>6:2 FTEO10</b> | 8.05 (0.18)                                        |
| <b>6:2 FTEO11</b> | 5.04 (0.05)                                        |
| <b>6:2 FTEO12</b> | 2.95 (0.08)                                        |
| <b>6:2 FTEO13</b> | 1.64 (0.05)                                        |
| <b>TOTAL:</b>     | 92.74 (1.85)                                       |



**Table S8:** 6:2 FTOH exposure potential for the anti-fog sprays.

| <b>Spray ID</b> | <b>Solution Density (g/mL)</b> | <b>Solution Mass per use (g/spray)</b> | <b>Potential Exposure to FTEOs and FTOHs per use (µg/use)</b> |
|-----------------|--------------------------------|----------------------------------------|---------------------------------------------------------------|
| <b>A</b>        | 0.9509                         | 0.1335                                 | 3500                                                          |
| <b>B</b>        | 0.9762                         | 0.0890                                 | 29.8                                                          |
| <b>C</b>        | 0.9639                         | 0.1451                                 | 79.6                                                          |
| <b>D</b>        | 0.9896                         | 0.1641                                 | 93.8                                                          |

## Supporting HPLC Figures

RT :0.00-20.00

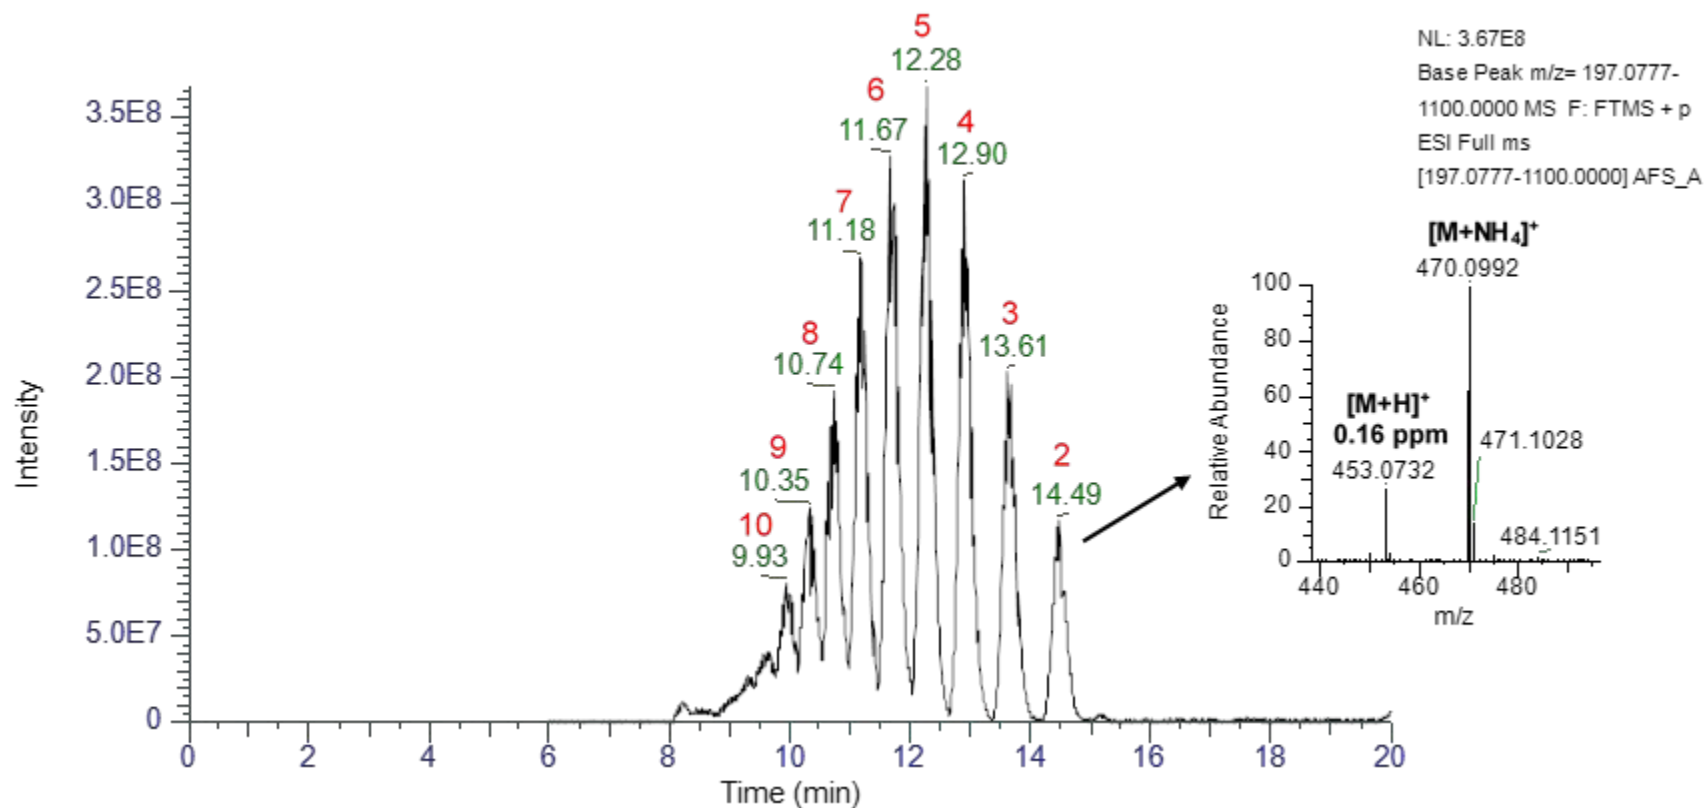

**Figure S2:** HPLC-HRMS base-peak chromatogram from analysis of anti-fog spray “A” showing 6:2 FTEO elution series. Red numbers indicate ethoxyl chain lengths (e.g. “2” = FT2EO). Inset shows example mass spectrum for FT2EO peak, illustrating formation of  $[M+H]^+$  and  $[M+NH_4]^+$  ions and measurement with 0.16 ppm mass accuracy.

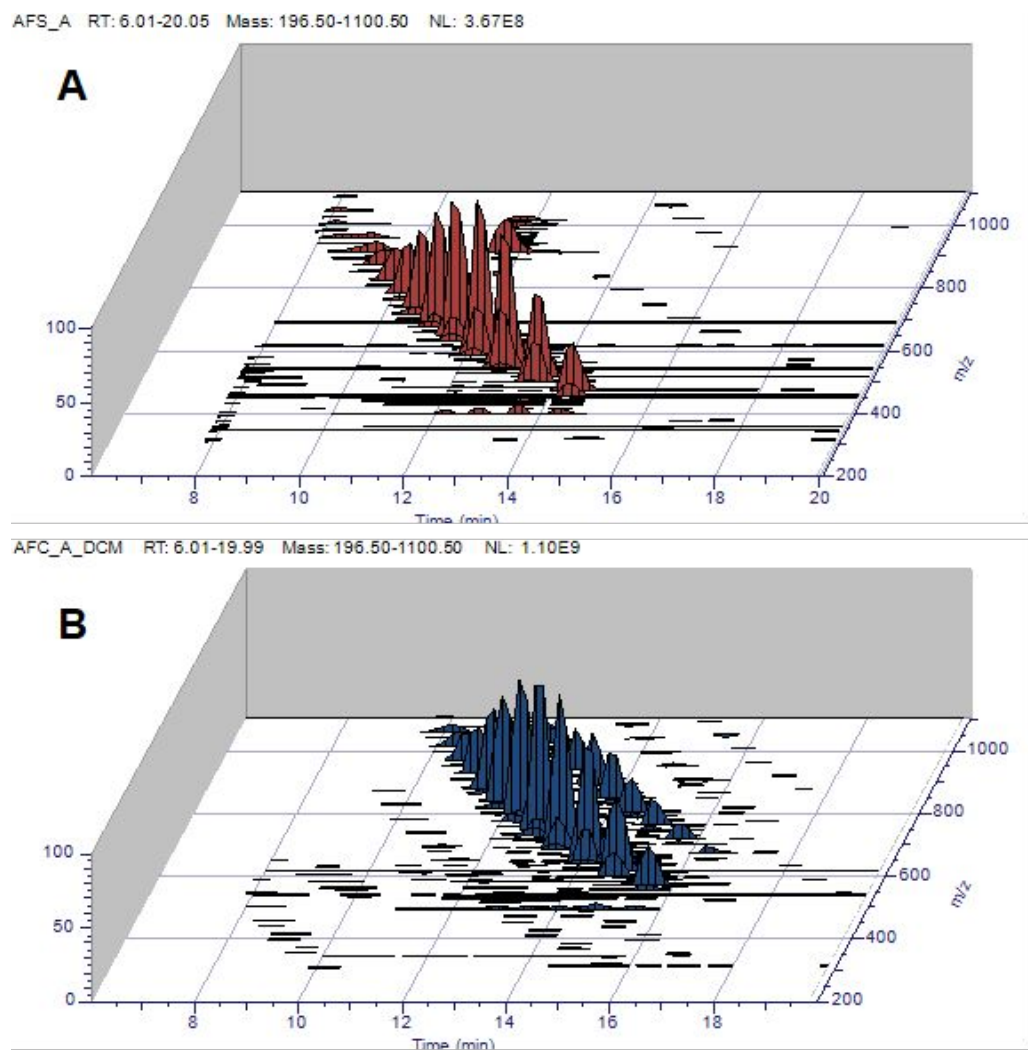

**Figure S3:** HPLC-HRMS map displays from analysis of (A) anti-fog spray “A” showing 6:2 FTEO elution series and (B) anti-fog cloth extract “A” showing complex mixture of multiple n:2 FTEO series eluting at later retention times and higher m/z.

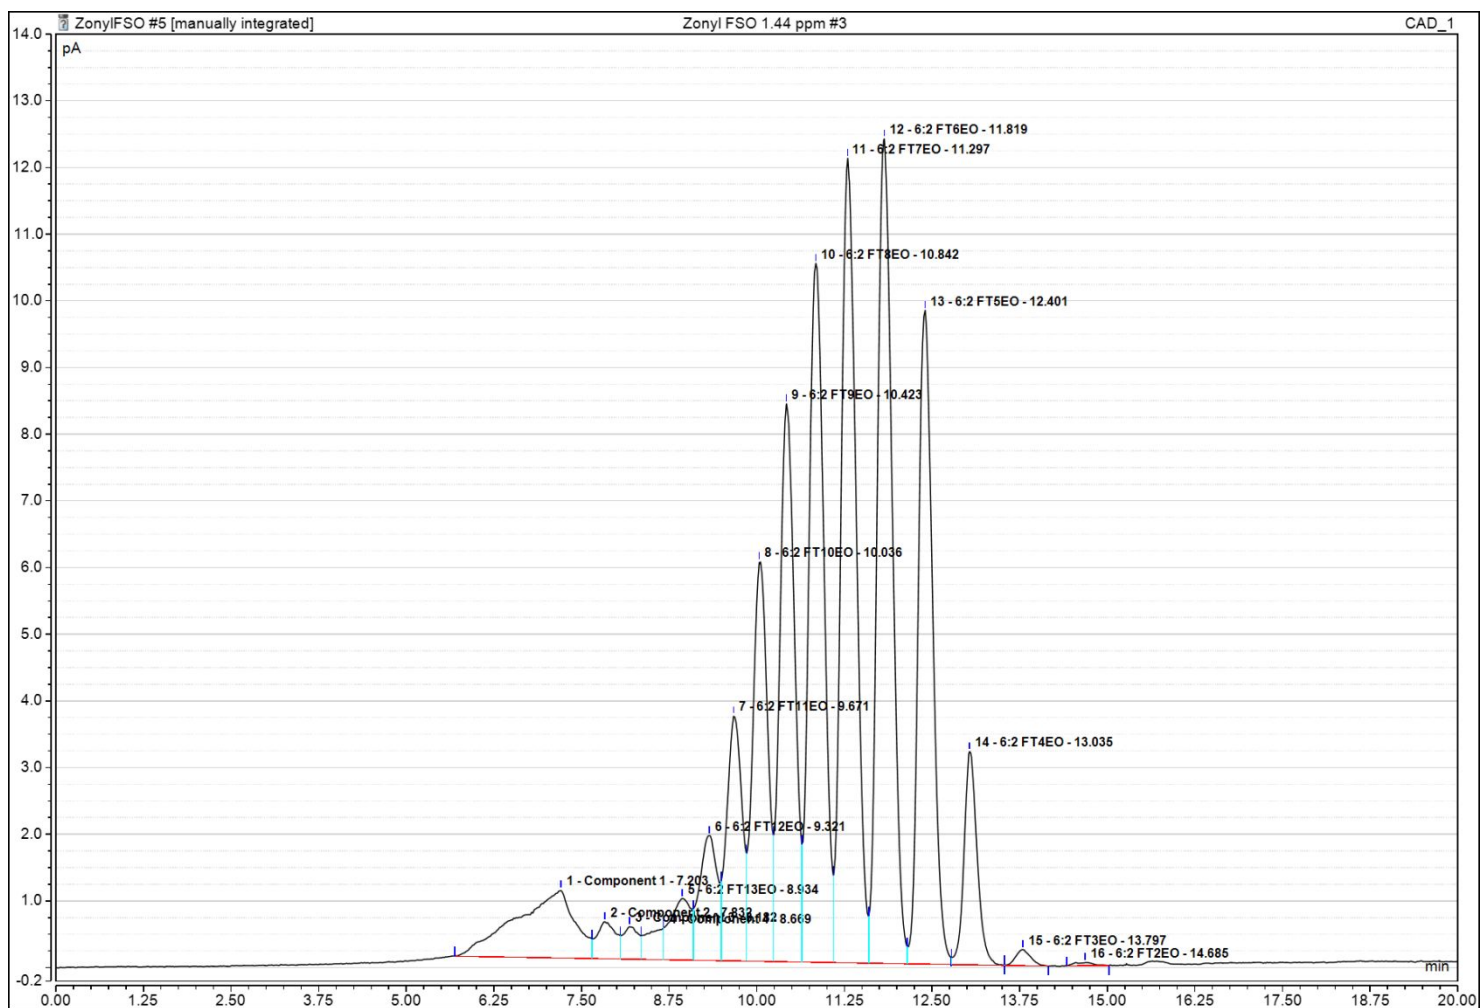

**Figure S4:** HPLC-CAD analysis of 6:2 FTEO fluorosurfactant formulation showing elution of individual ethoxymers under applied separation conditions.

## Supporting GC-HRMS Figures

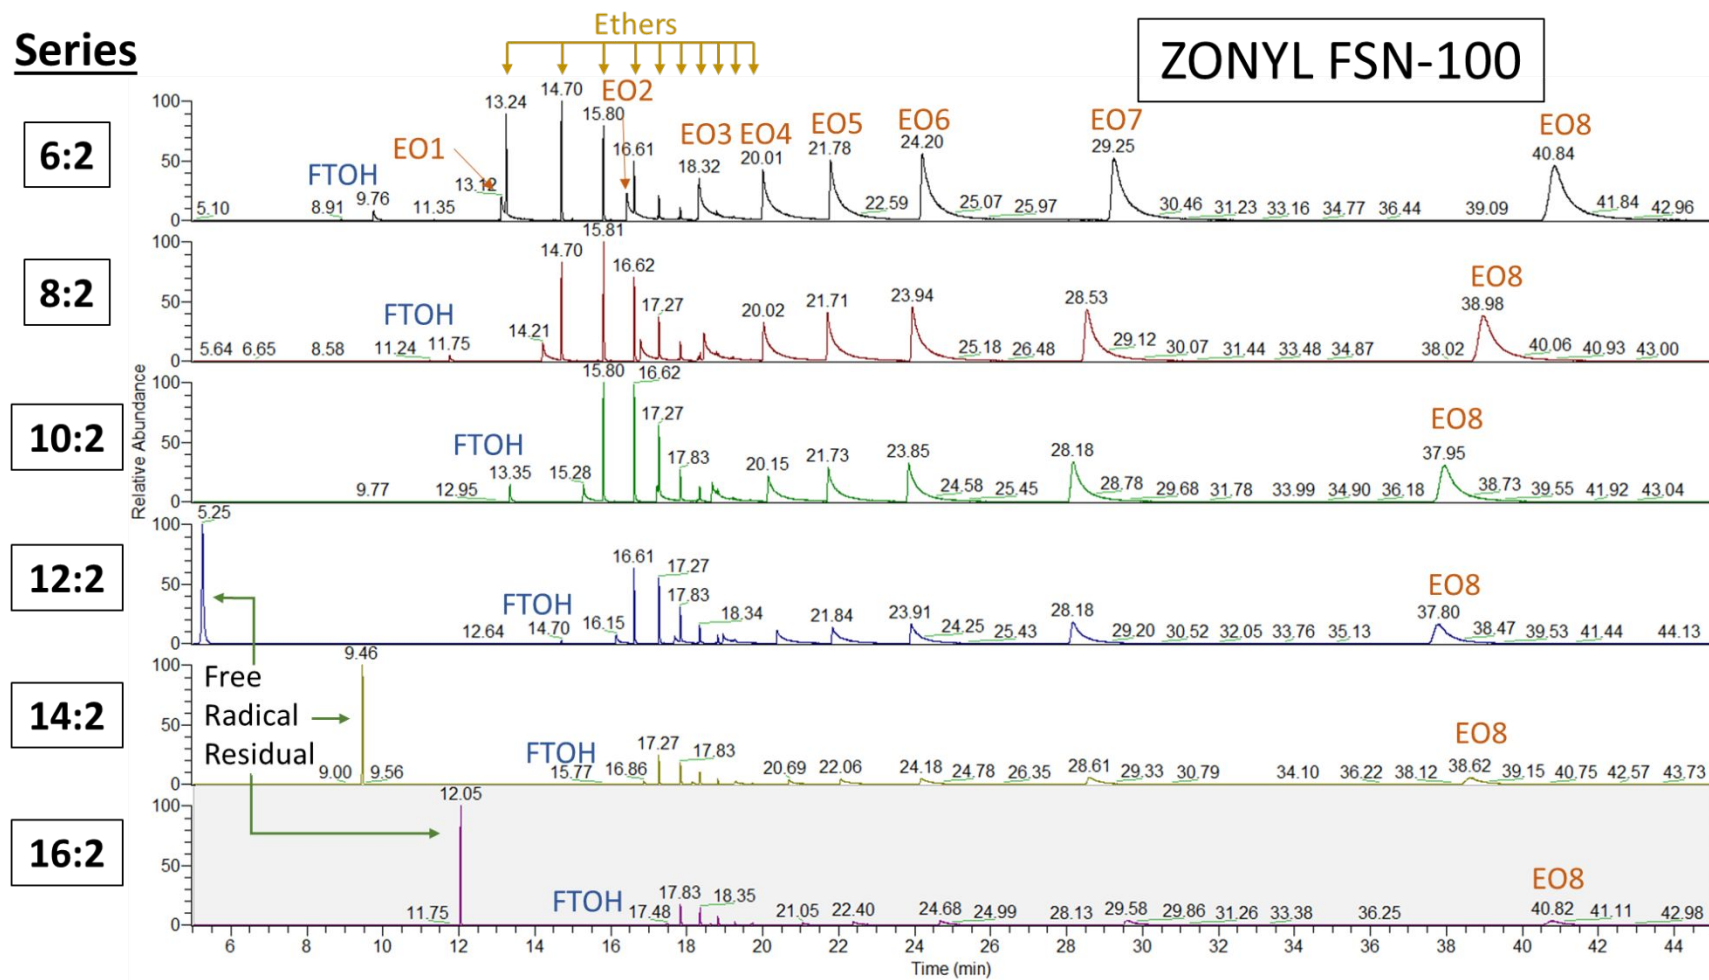

**Figure S5:** GC-HRMS Characterization of ZONYL-FSN 100 commercial mixture.

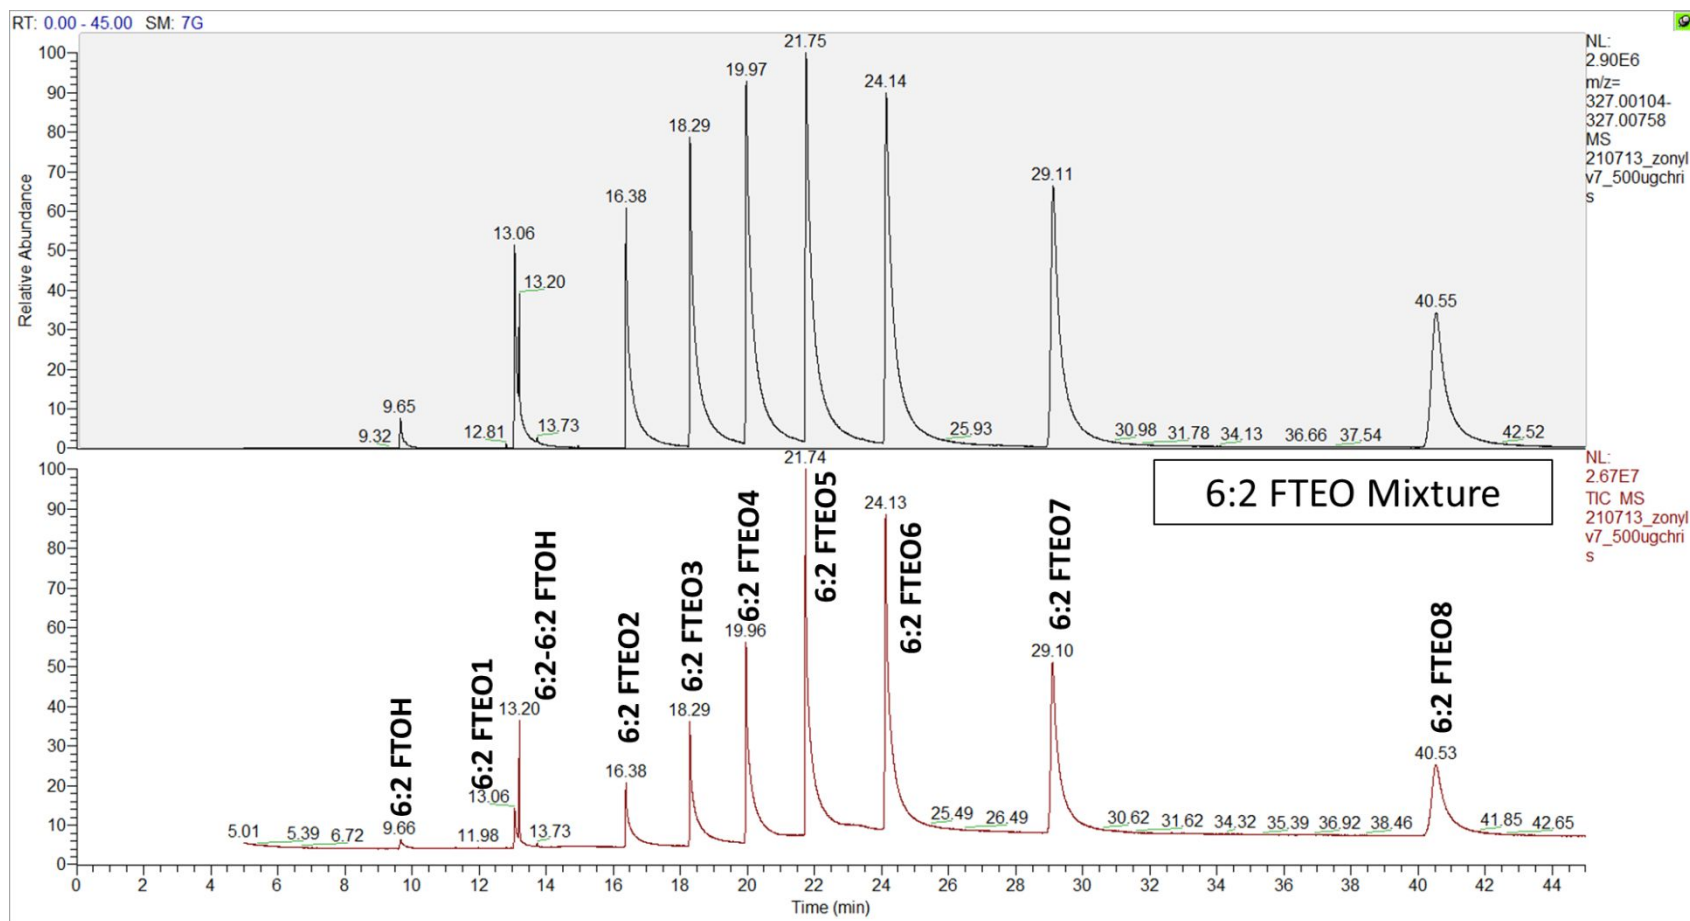

Figure S6: GC-HRMS Characterization of 6:2 FTEO commercial mixture.

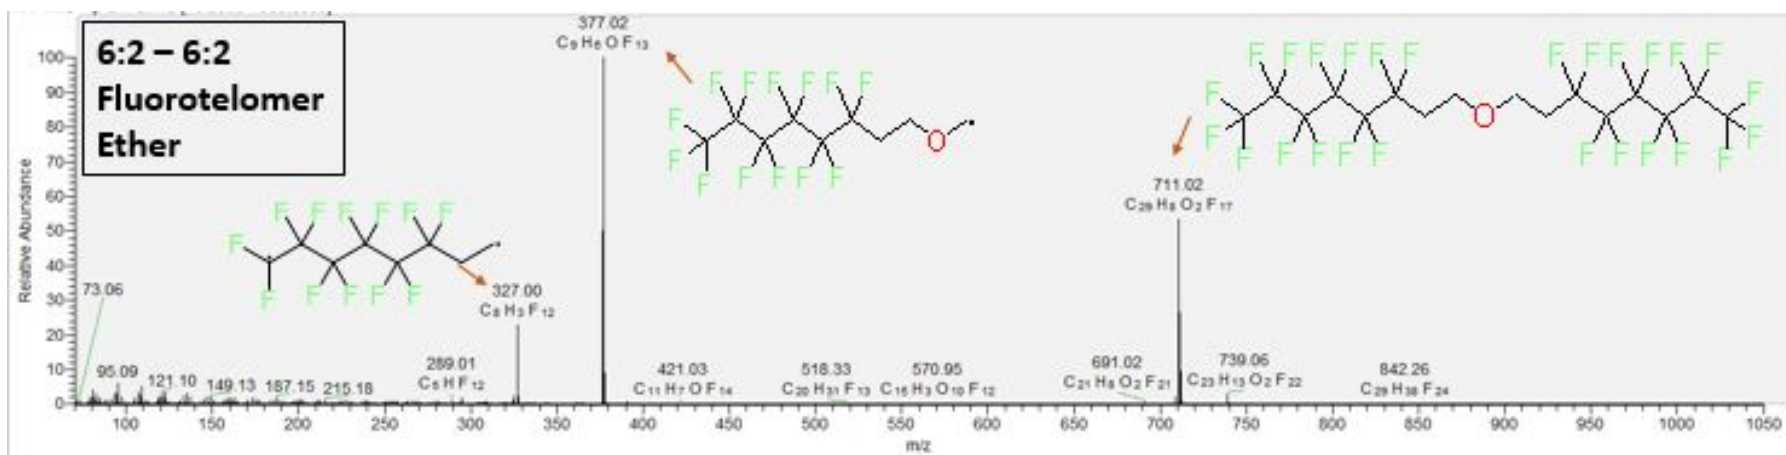

Figure S7: Spectra for 1,1,1,2,2,3,3,4,4,5,5,6,6-tridecafluoro-8-((3,3,4,4,5,5,6,6,7,7,8,8,8-tridecafluorooctyl)oxy)octane

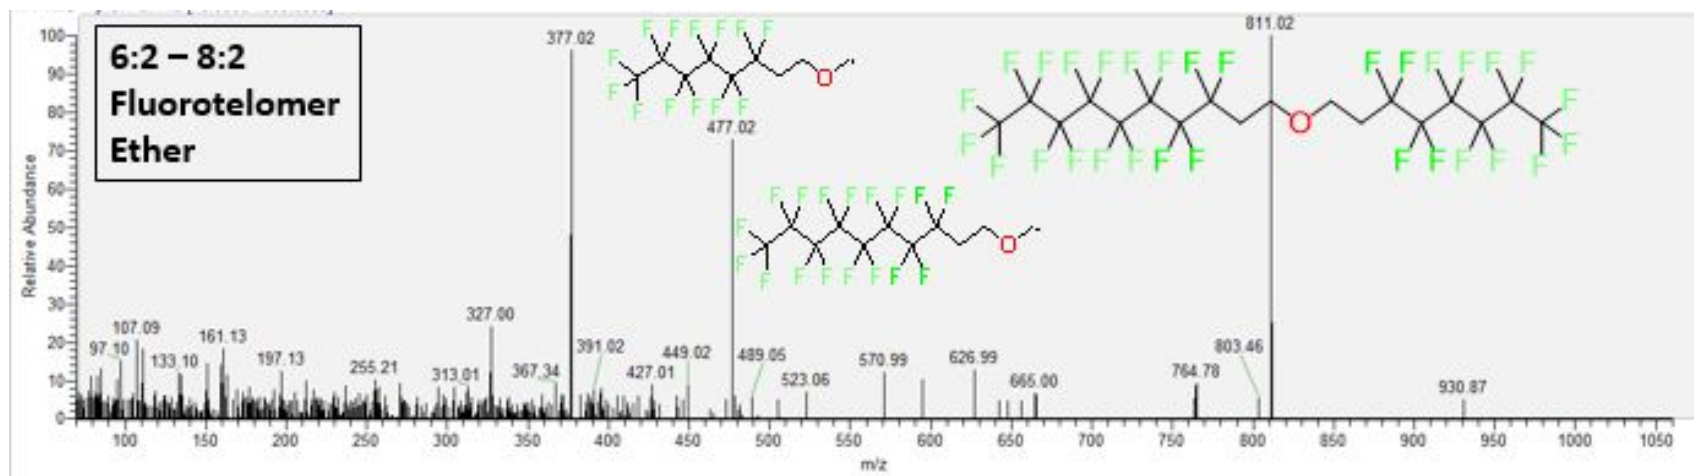

Figure S8: Spectra for 1,1,1,2,2,3,3,4,4,5,5,6,6,7,7,8,8-heptadecafluoro-10-((3,3,4,4,5,5,6,6,7,7,8,8,8-tridecafluorooctyl)oxy)decane



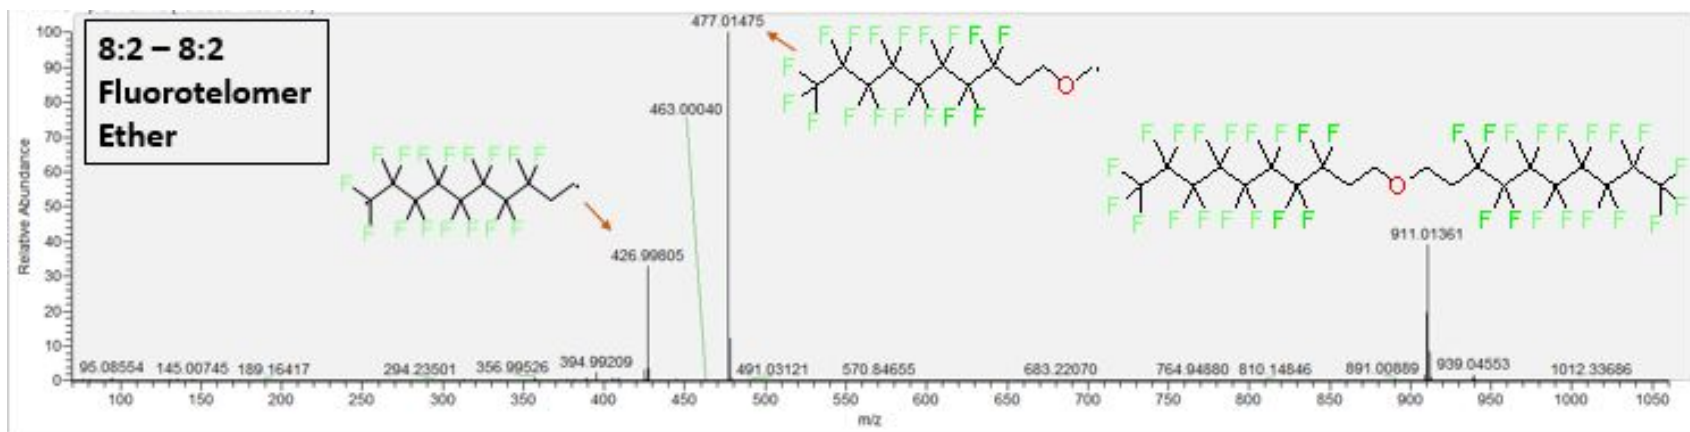

Figure S9: Spectra for 1,1,1,2,2,3,3,4,4,5,5,6,6,7,7,8,8-heptadecafluoro-10-((3,3,4,4,5,5,6,6,7,7,8,8,9,9,10,10,10-heptadecafluorodecyl)oxy)decane

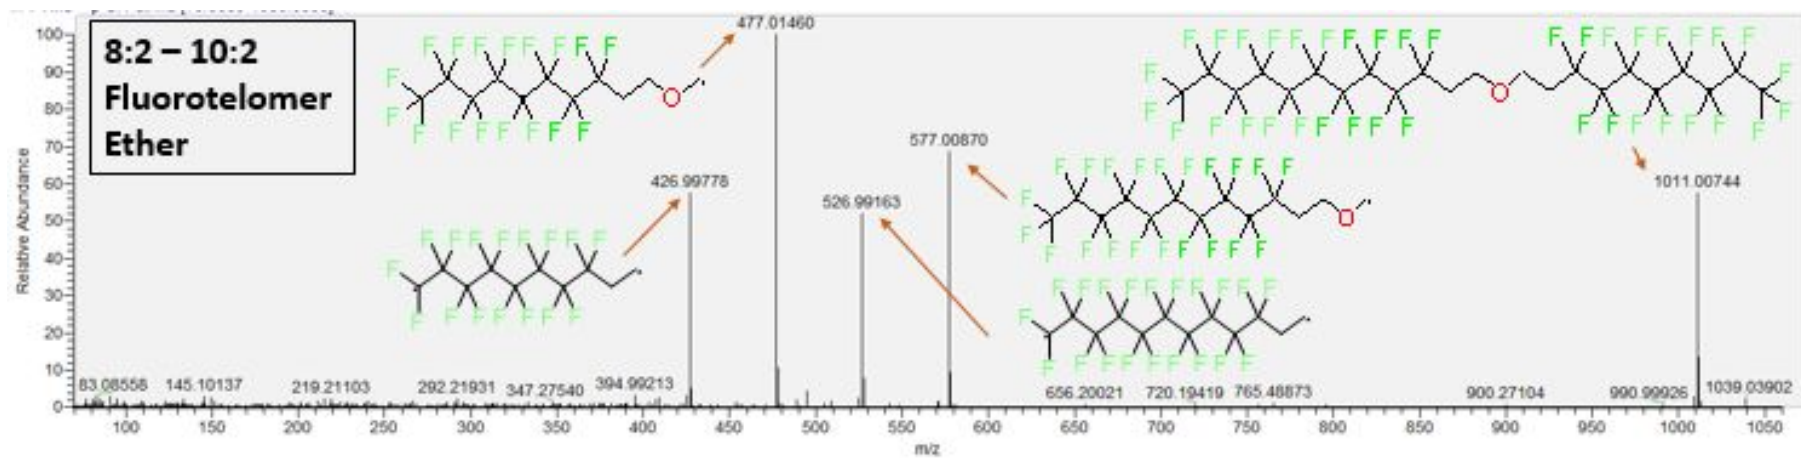

Figure S10: Spectra for 1,1,1,2,2,3,3,4,4,5,5,6,6,7,7,8,8,9,9,10,10-henicosafuoro-12-((3,3,4,4,5,5,6,6,7,7,8,8,9,9,10,10,10-heptadecafluorodecyl)oxy)dodecane



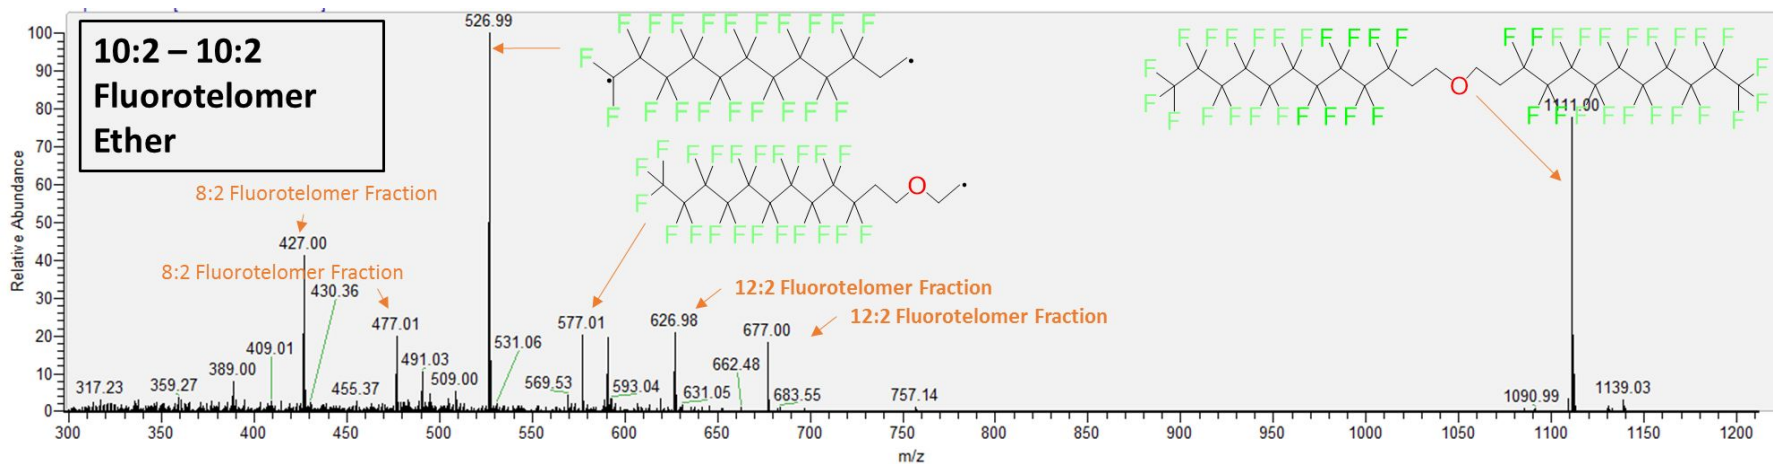

Figure S11: Spectra for 1,1,1,2,2,3,3,4,4,5,5,6,6,7,7,8,8,9,9,10,10-henicosafluoro-12-((3,3,4,4,5,5,6,6,7,7,8,8,9,9,10,10,11,11,12,12,12-henicosafluorododecyl)oxy)dodecane. There is evidence that 10:2-10:2 fluorotelomer ether is coeluting with 8:2-12:2 Fluorotelomer ether, which shares the same exact mass.

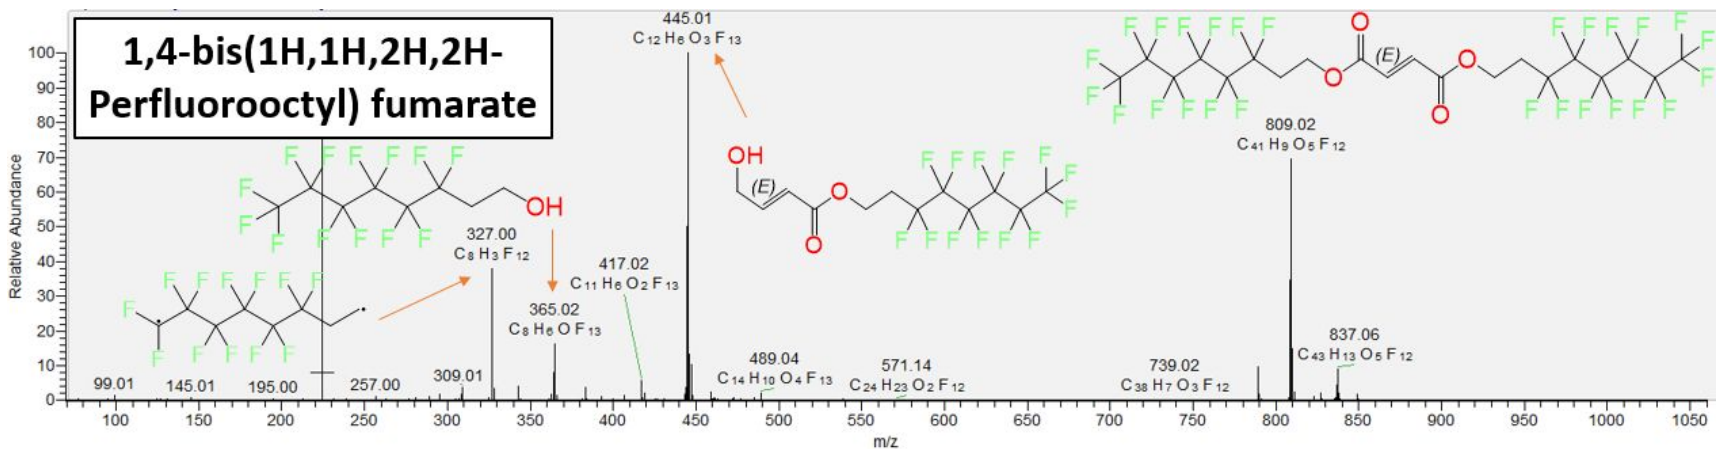

Figure S12: Spectra for 1,4-bis(1H,1H,2H,2H-Perfluorooctyl) fumarate

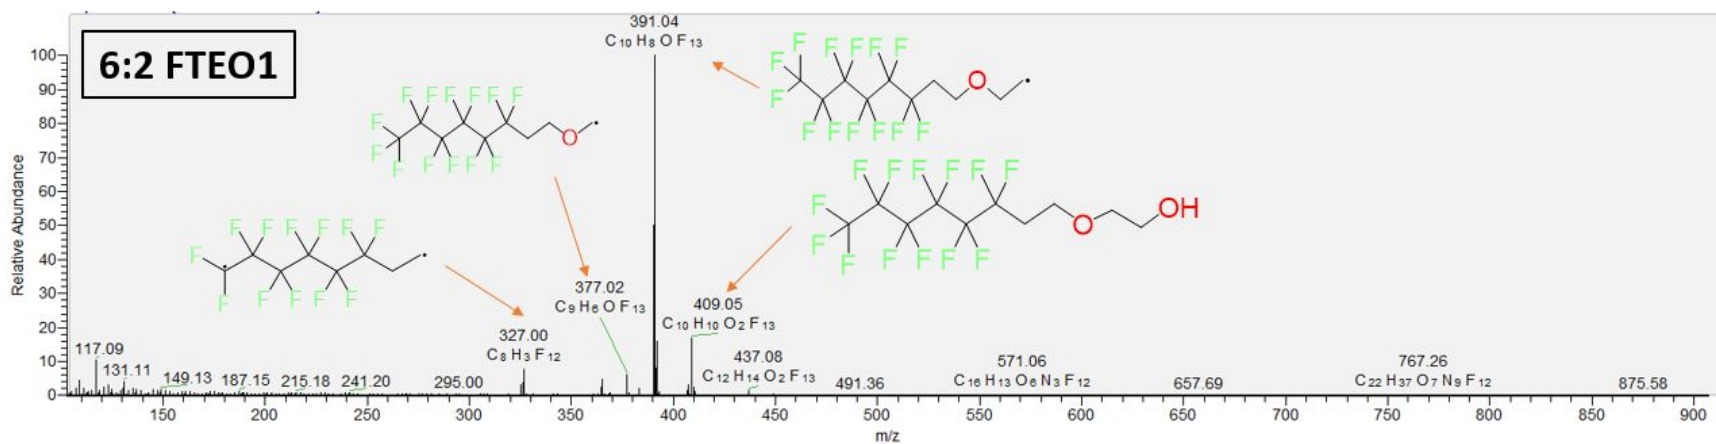

Figure S13: Spectra for 2-((3,3,4,4,5,5,6,6,7,7,8,8,8-tridecafluorooctyl)oxy)ethan-1-ol

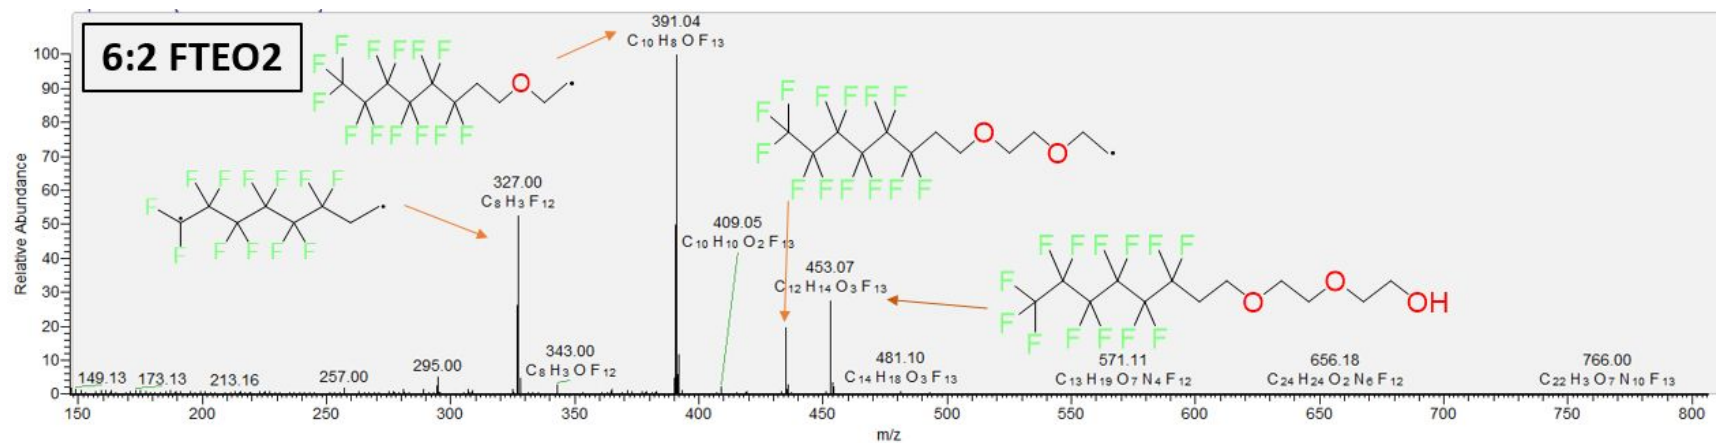

Figure S14: Spectra for 2-(2-((3,3,4,4,5,5,6,6,7,7,8,8,8-tridecafluorooctyl)oxy)ethoxy)ethan-1-ol

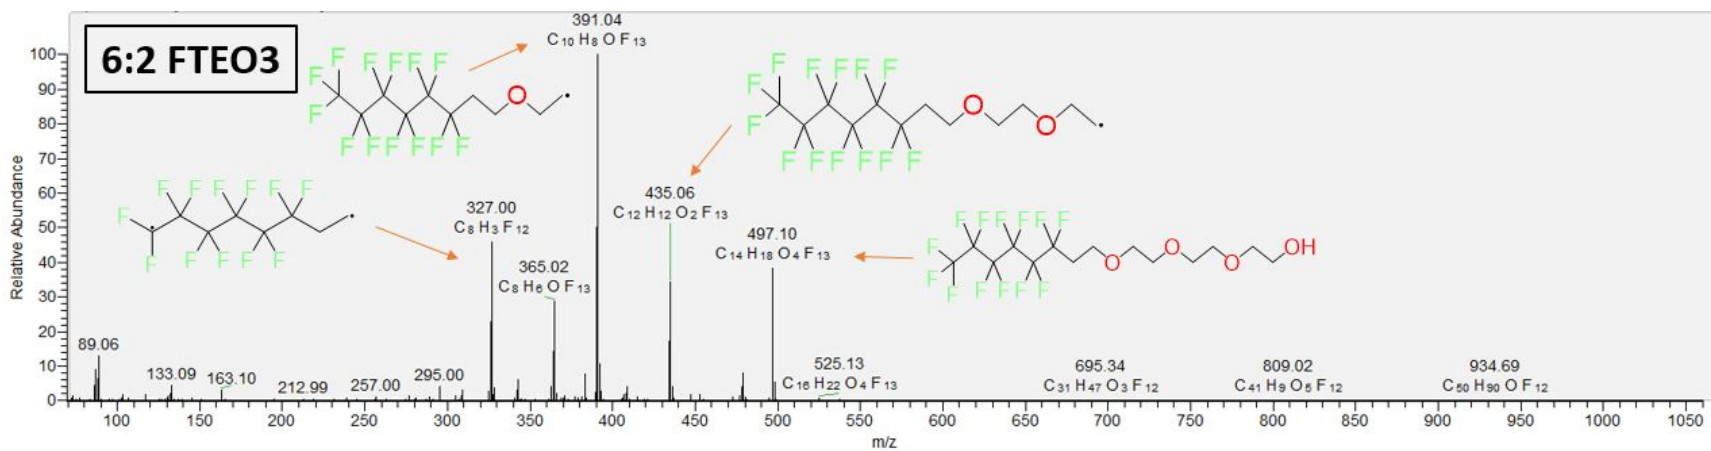

Figure S15: Spectra for 2-(2-(2-((3,3,4,4,5,5,6,6,7,7,8,8,8-tridecafluorooctyl)oxy)ethoxy)ethoxy)ethan-1-ol

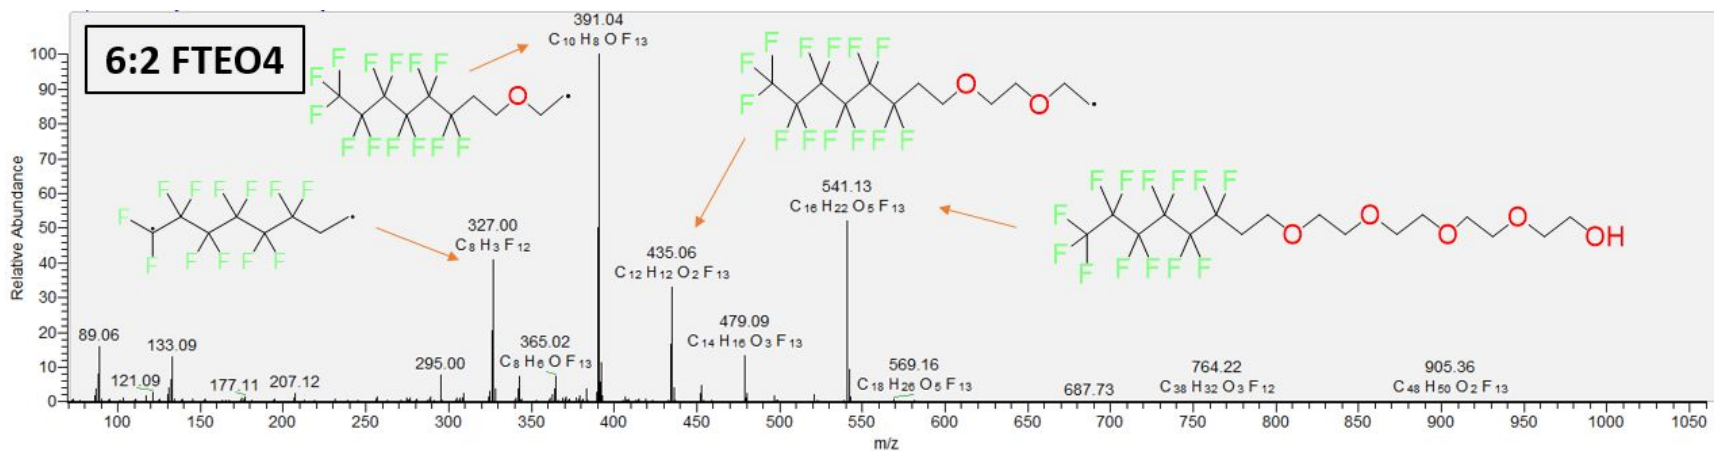

Figure S16: Spectra for 15,15,16,16,17,17,18,18,19,19,20,20,20-tridecafluoro-3,6,9,12-tetraoxaicosan-1-ol

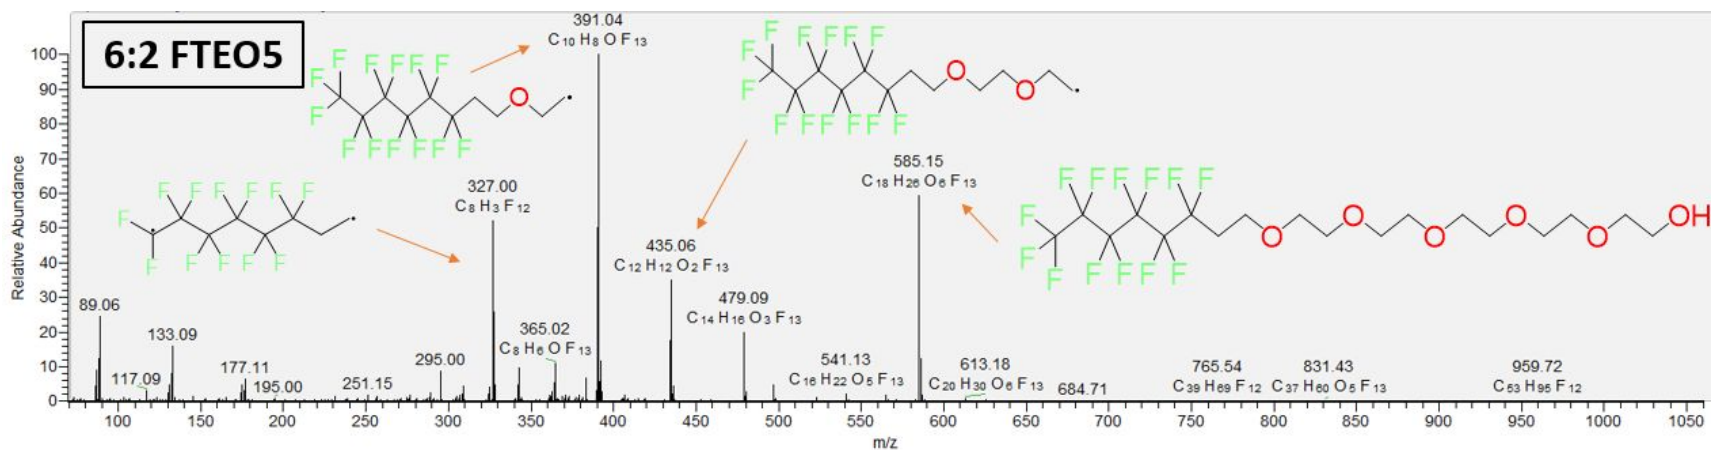

Figure S17: Spectra for 18,18,19,19,20,20,21,21,22,22,23,23-tridecafluoro-3,6,9,12,15-pentaoxatricosan-1-ol

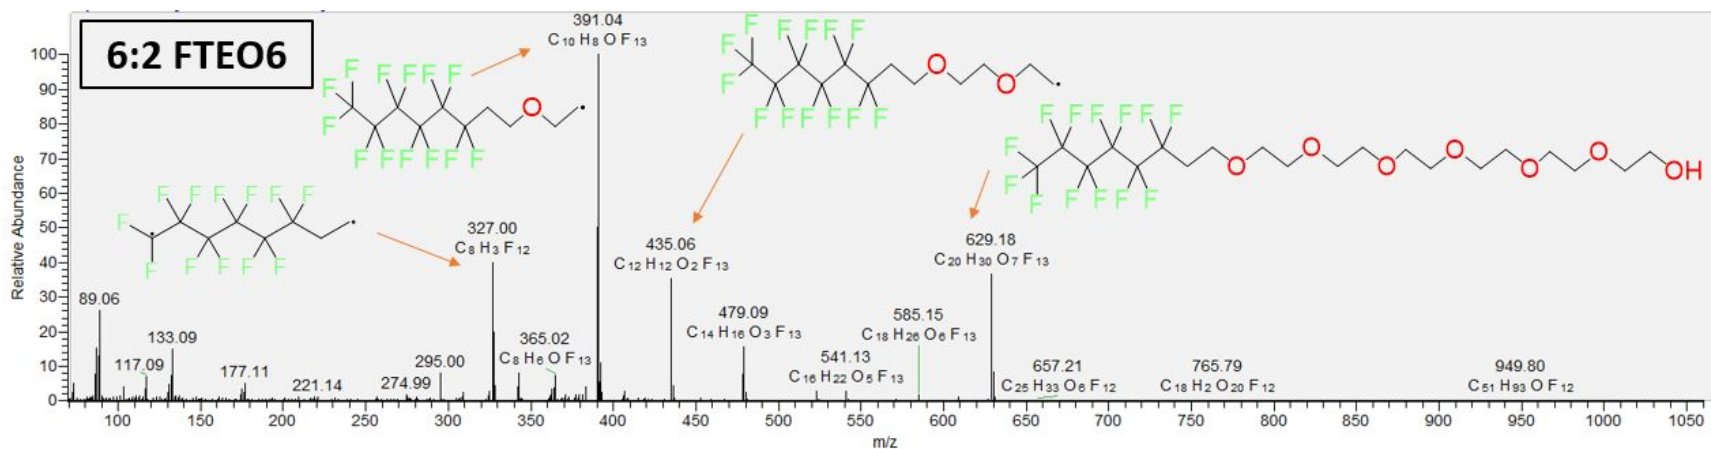

Figure S18: Spectra for 21,21,22,22,23,23,24,24,25,25,26,26,26-tridecafluoro-3,6,9,12,15,18-hexaoxahexacosan-1-ol



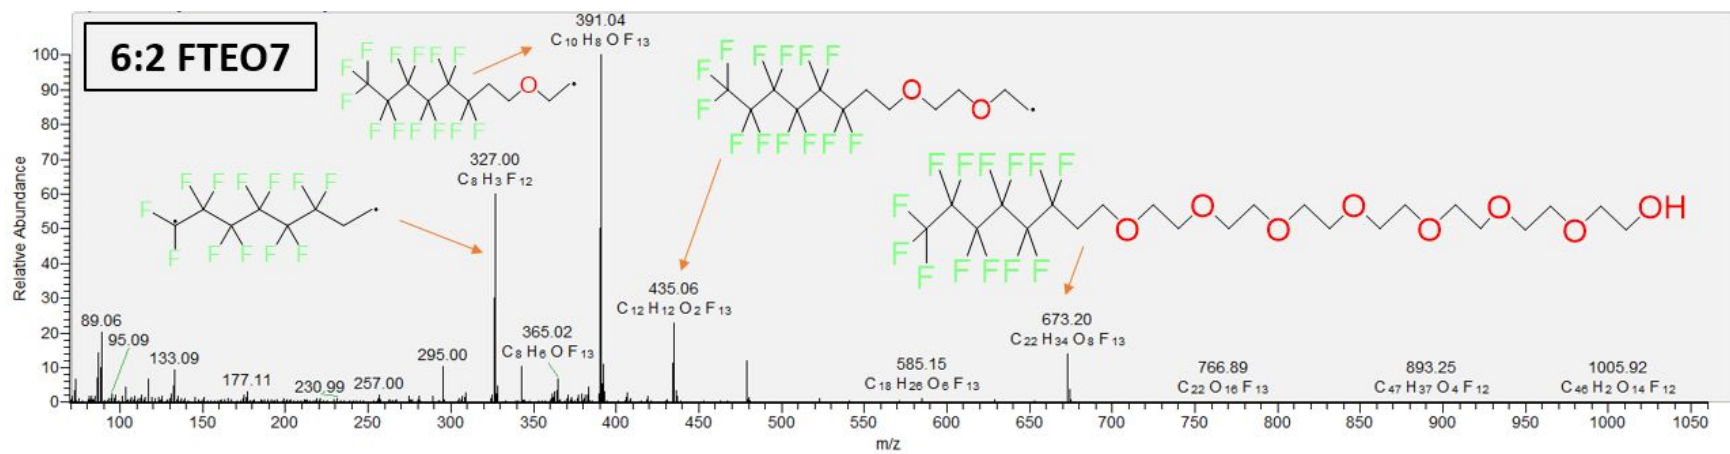

Figure S19: Spectra for 24,24,25,25,26,26,27,27,28,28,29,29,29-tridecafluoro-3,6,9,12,15,18,21-heptaoxanonacosan-1-ol

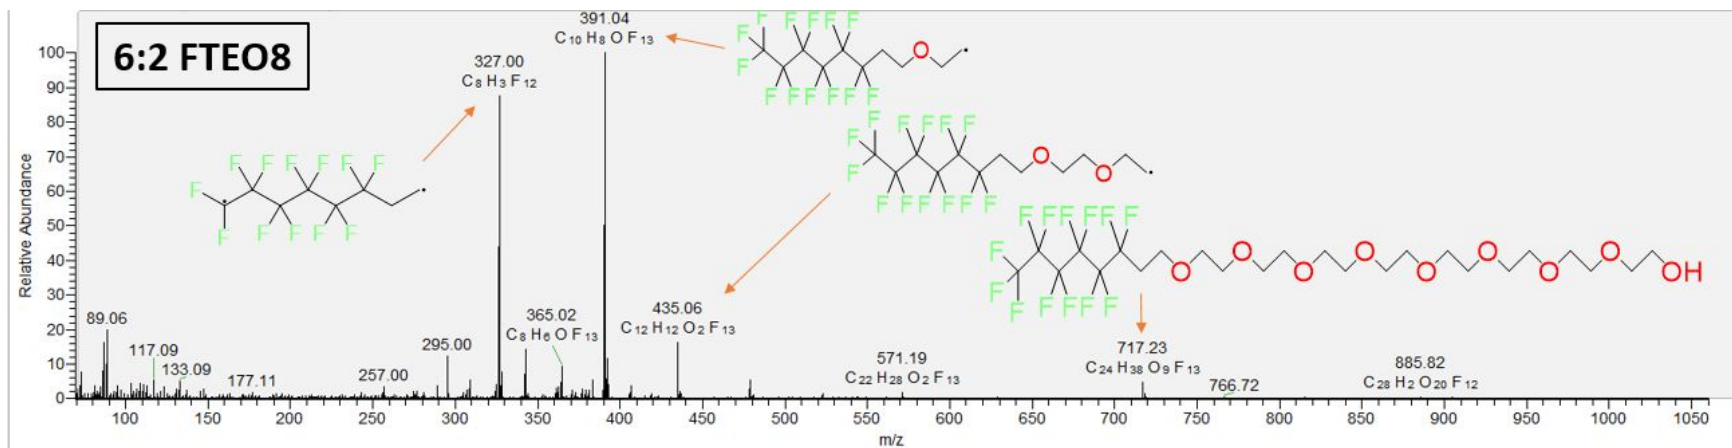

Figure S20: Spectra for 27,27,28,28,29,29,30,30,31,31,32,32,32-tridecafluoro-3,6,9,12,15,18,21,24-octaoxadotriacontan-1-ol

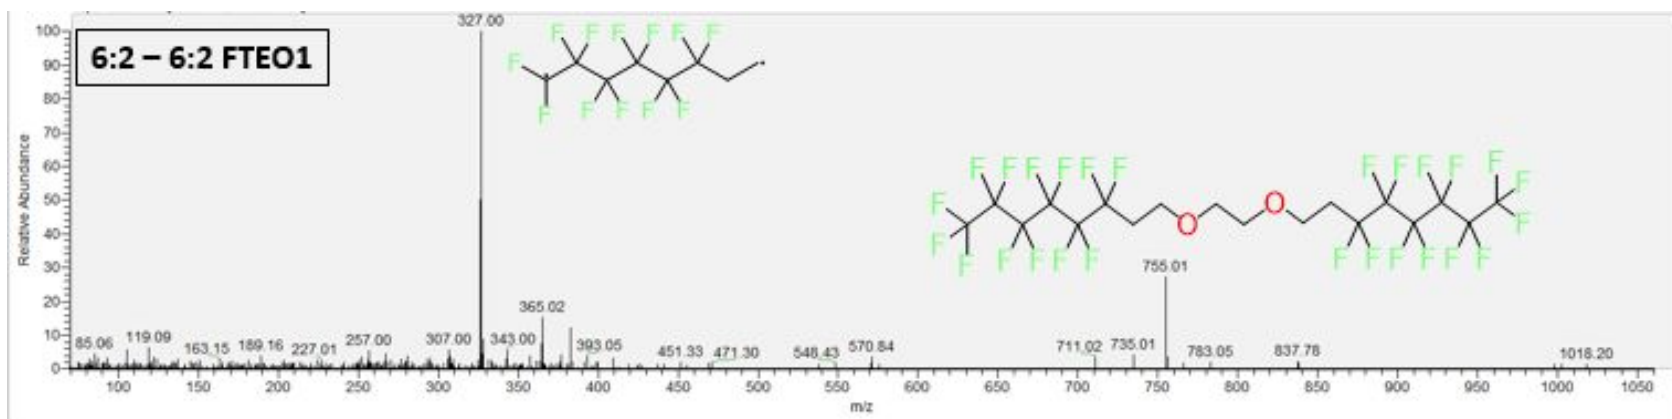

Figure S21: Spectra for 1,2-bis((3,3,4,4,5,5,6,6,7,7,8,8,8-tridecafluorooctyl)oxy)ethane

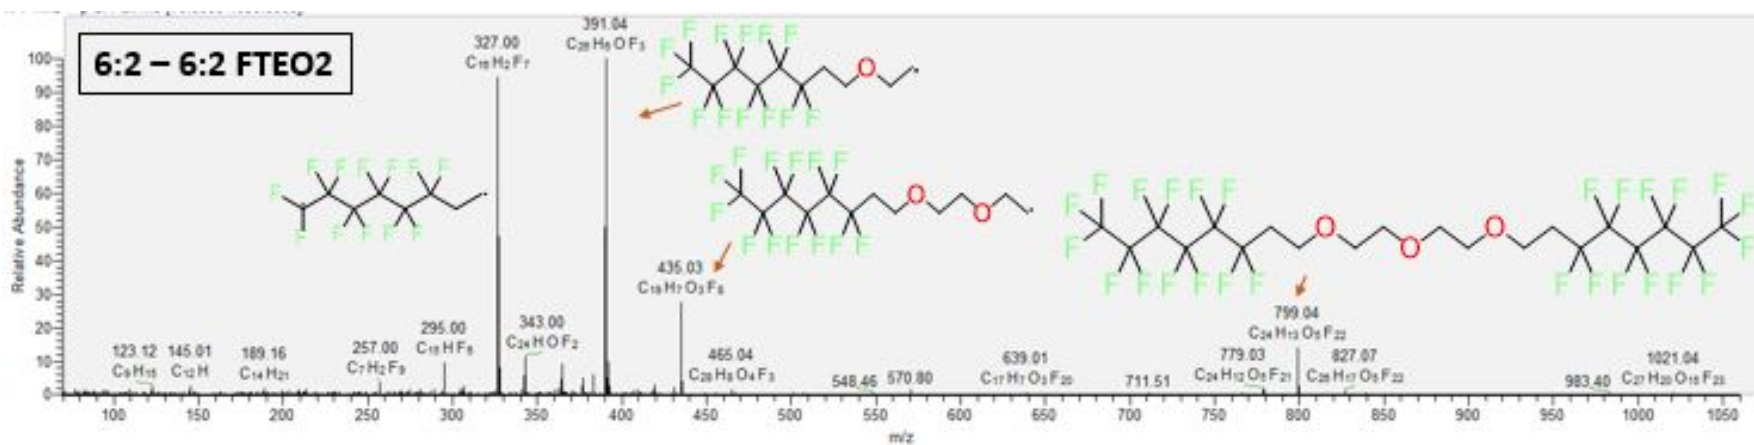

Figure S22: Spectra for 1,1,1,2,2,3,3,4,4,5,5,6,6-tridecafluoro-8-(2-(2-((3,3,4,4,5,5,6,6,7,7,8,8,8-tridecafluorooctyl)oxy)ethoxy)ethoxy)octane

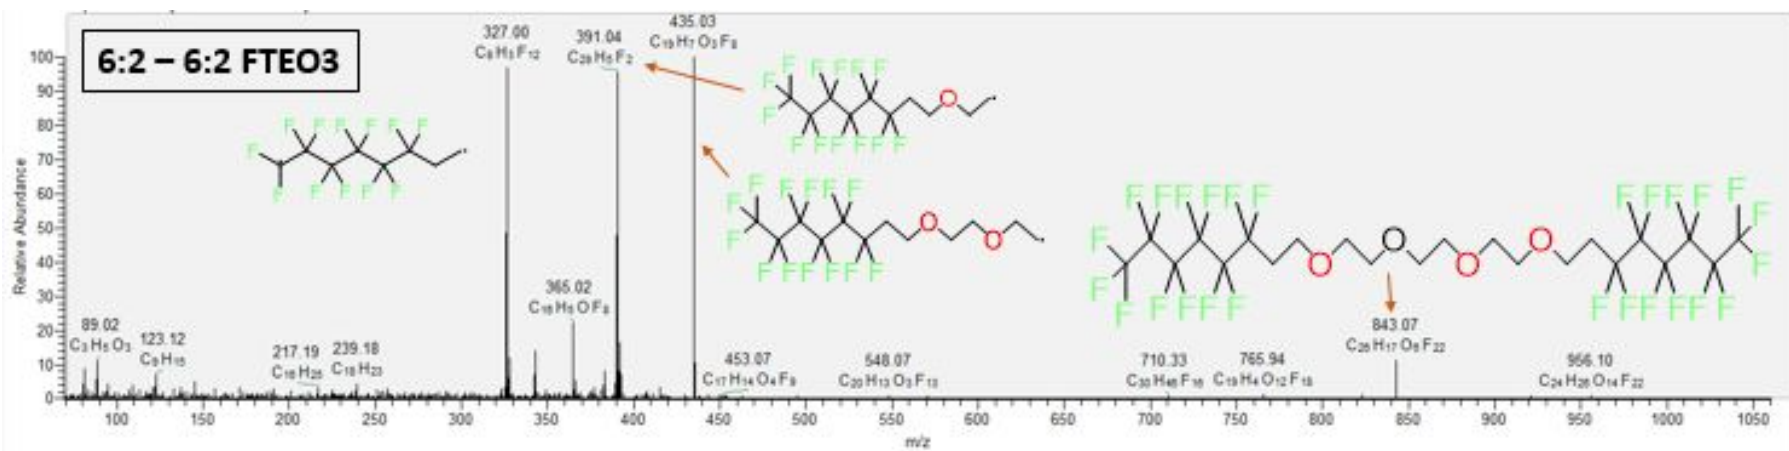

Figure S23: Spectra for 1,1,1,2,2,3,3,4,4,5,5,6,6,21,21,22,22,23,23,24,24,25,25,26,26,26-hexacosafuoro-9,12,15,18-tetraoxahexacosane

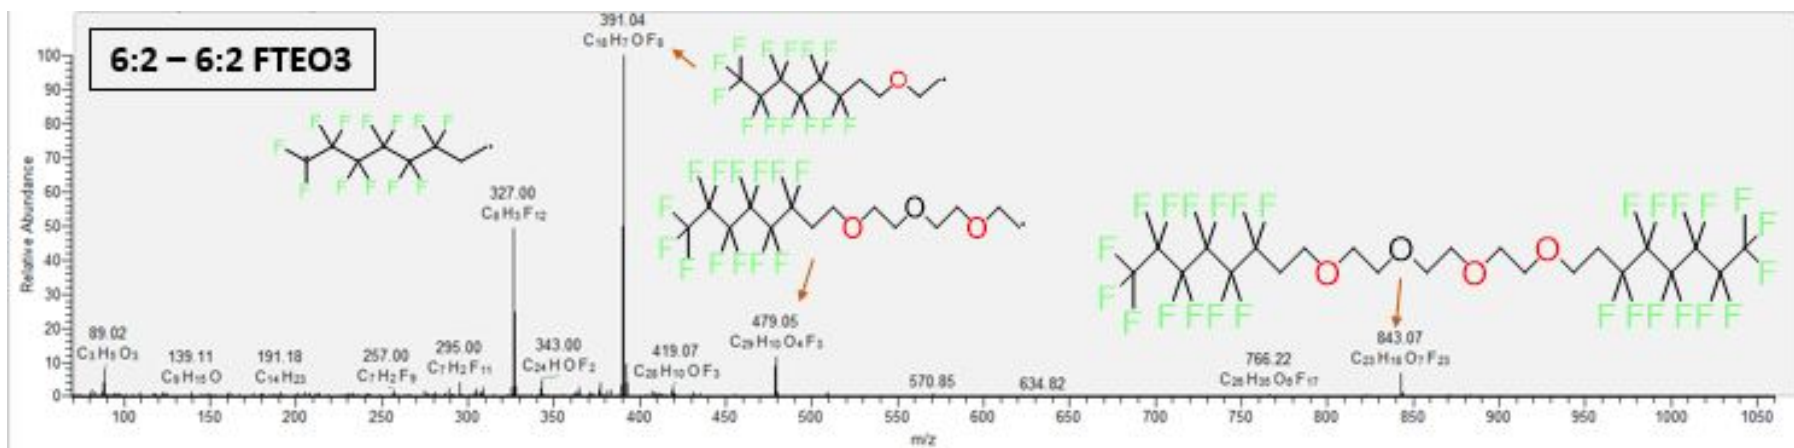

Figure S24: Spectra for 1,1,1,2,2,3,3,4,4,5,5,6,6,21,21,22,22,23,23,24,24,25,25,26,26,26-hexacosafuoro-9,12,15,18-tetraoxahexacosane

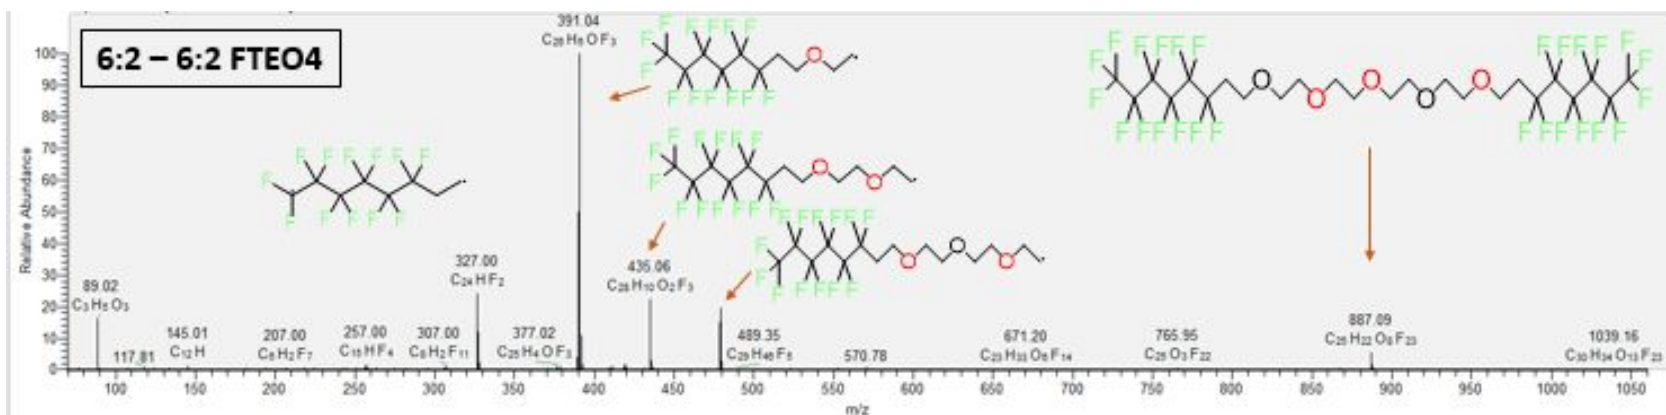

Figure S25: Spectra for 1,1,1,2,2,3,3,4,4,5,5,6,6,24,24,25,25,26,26,27,27,28,28,29,29,29-hexacosafuoro-9,12,15,18,21-pentaoxanonacosane

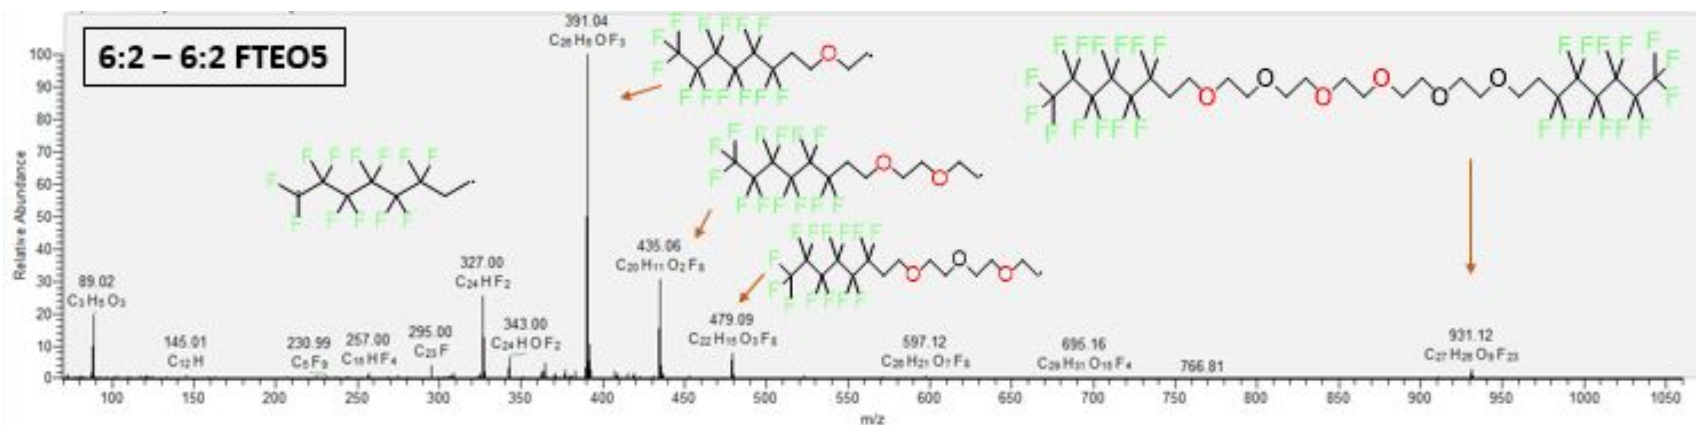

Figure S26: Spectra for 1,1,1,2,2,3,3,4,4,5,5,6,6,27,27,28,28,29,29,30,30,31,31,32,32,32-hexacosafuoro-9,12,15,18,21,24-hexaoxadotriacontane



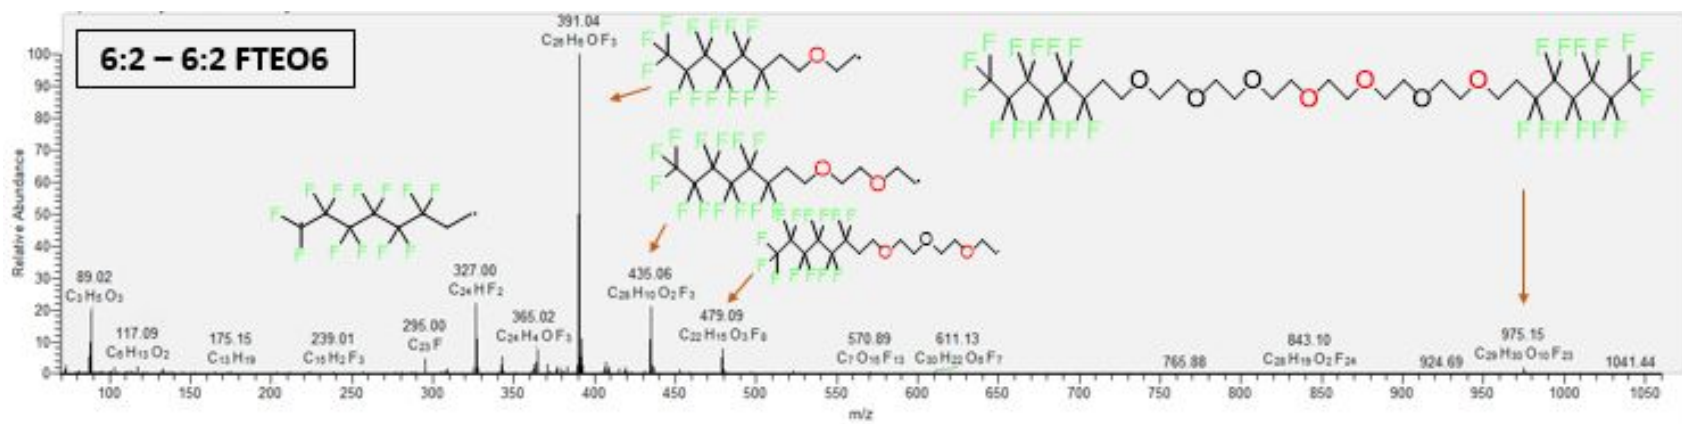

Figure S27: Spectra for 1,1,1,2,2,3,3,4,4,5,5,6,6,30,30,31,31,32,32,33,33,34,34,35,35,35-hexacosafuoro-9,12,15,18,21,24,27-heptaioxapentatriacontane

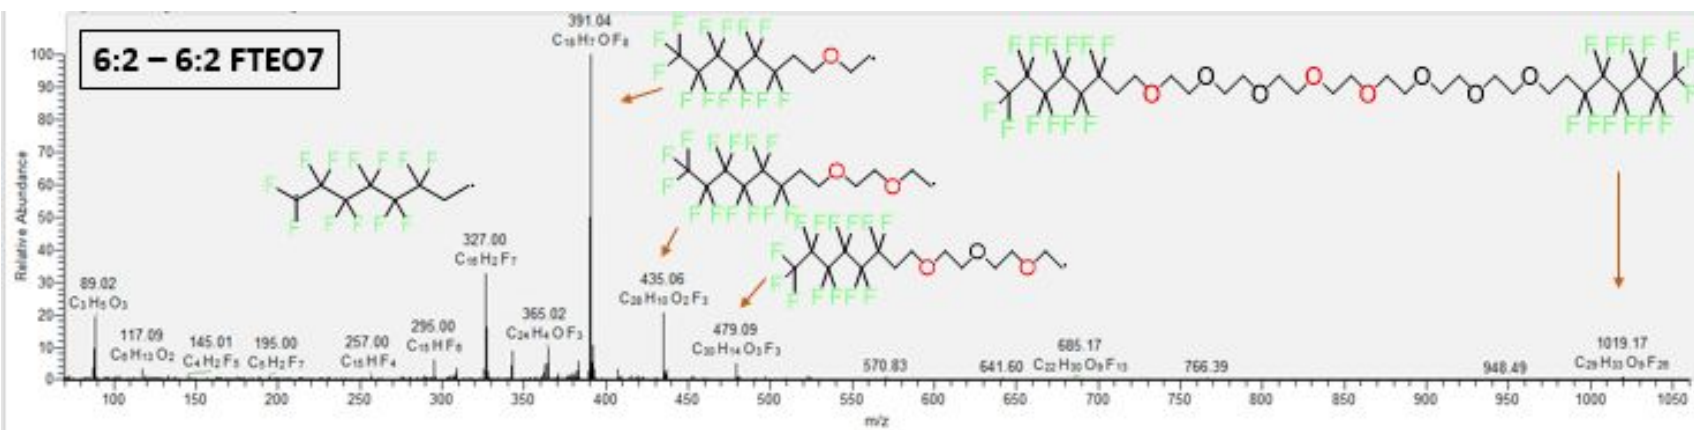

Figure S28: Spectra for 1,1,1,2,2,3,3,4,4,5,5,6,6,33,33,34,34,35,35,36,36,37,37,38,38,38-octaoxaoctatriacontane

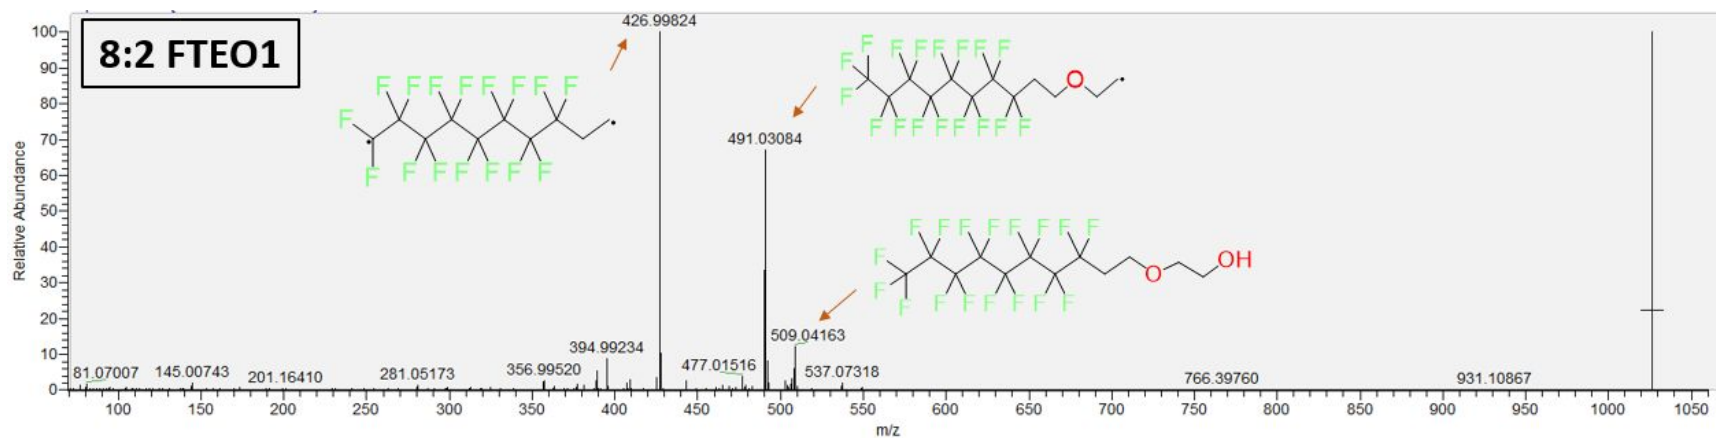

Figure S29: Spectra for 2-((3,3,4,4,5,5,6,6,7,7,8,8,9,9,10,10,10-heptadecafluorodecyl)oxy)ethan-1-ol

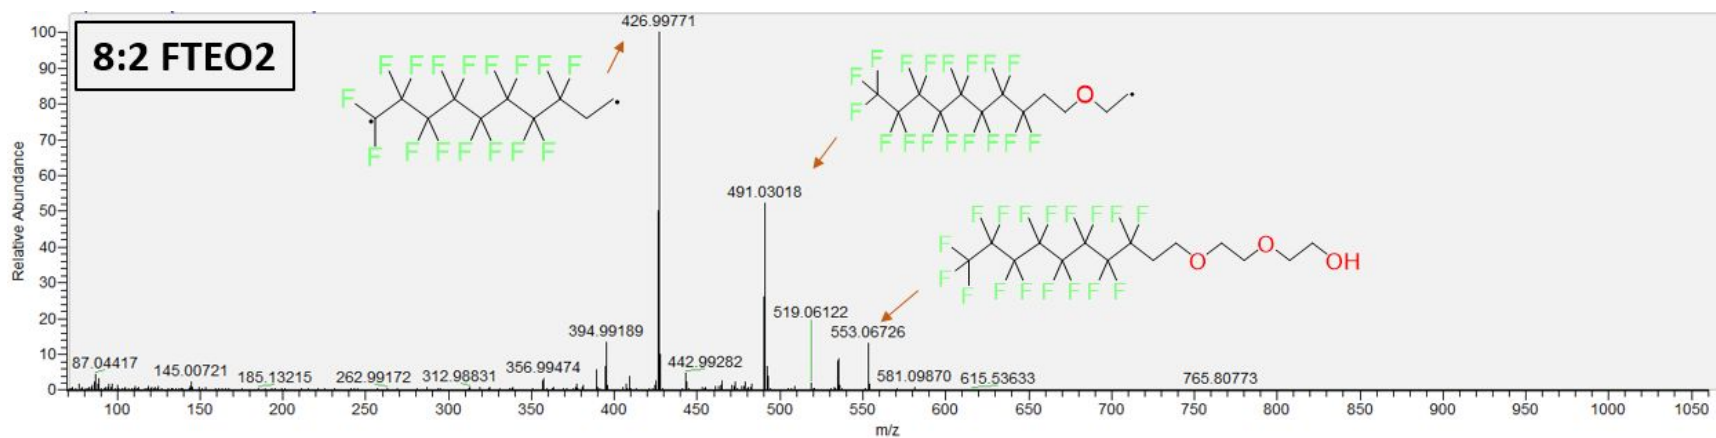

Figure S30: Spectra for 2-(2-((3,3,4,4,5,5,6,6,7,7,8,8,9,9,10,10,10-heptadecafluorodecyl)oxy)ethoxy)ethan-1-ol

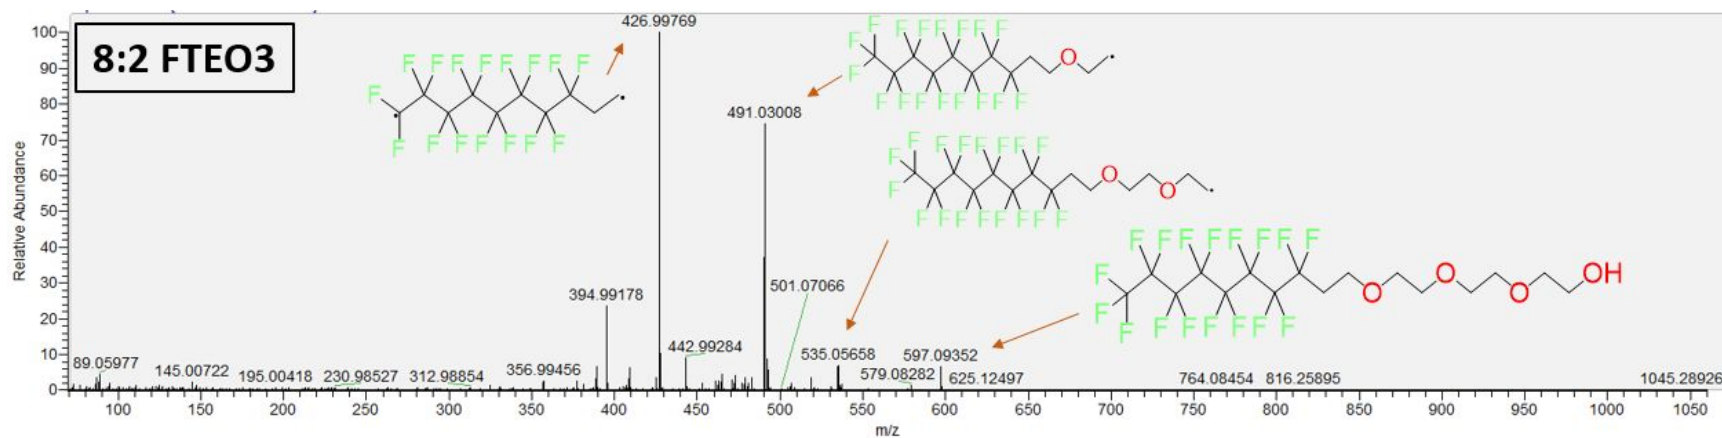

Figure S31: Spectra for 2-(2-(2-((3,3,4,4,5,5,6,6,7,7,8,8,9,9,10,10,10-heptafluorodecyl)oxy)ethoxy)ethoxy)ethan-1-ol

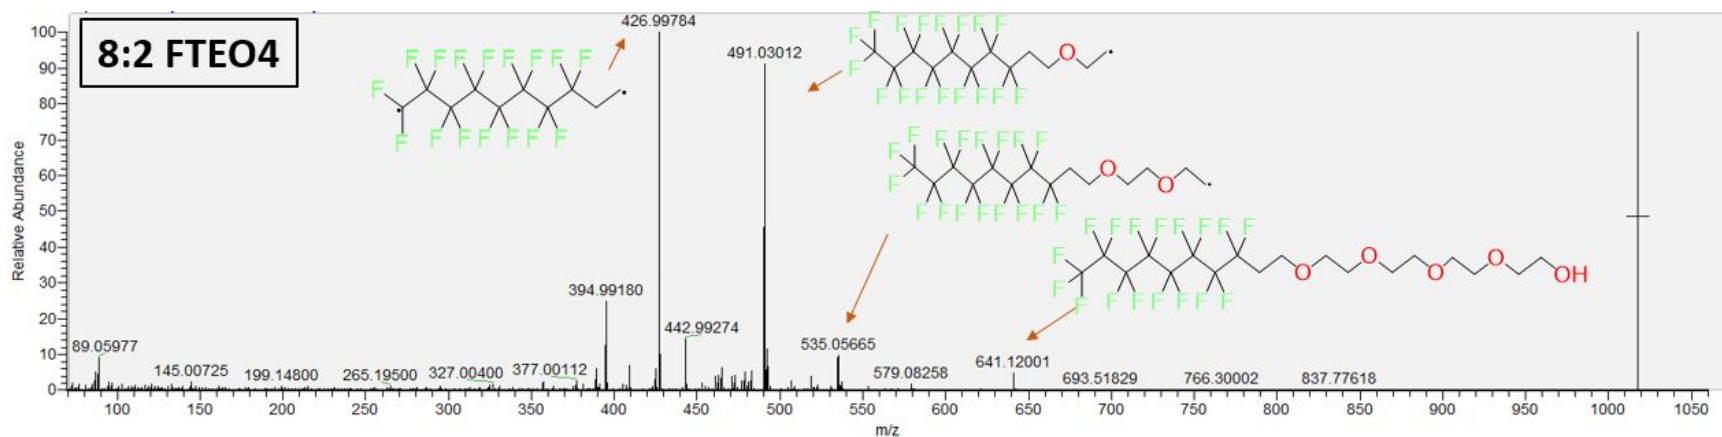

Figure S32: Spectra for 15,15,16,16,17,17,18,18,19,19,20,20,21,21,22,22,22-heptafluoro-3,6,9,12-tetraoxadocosan-1-ol

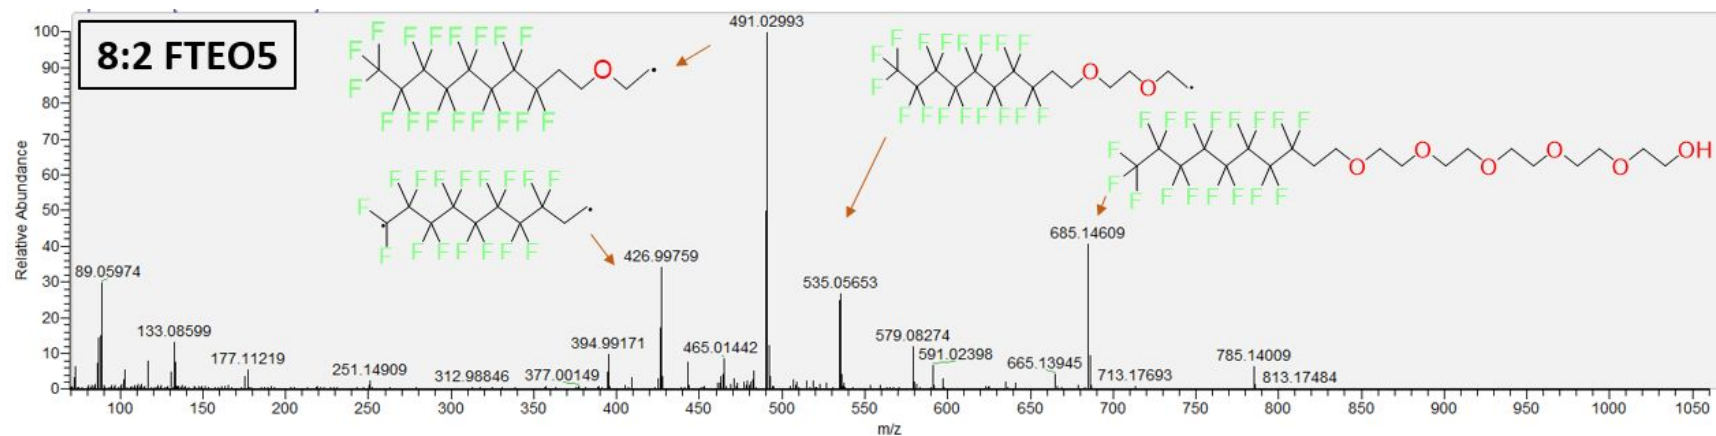

Figure S33: Spectra for 18,18,19,19,20,20,21,21,22,22,23,23,24,24,25,25,25-heptafluoro-3,6,9,12,15-pentaoxapentacosan-1-ol

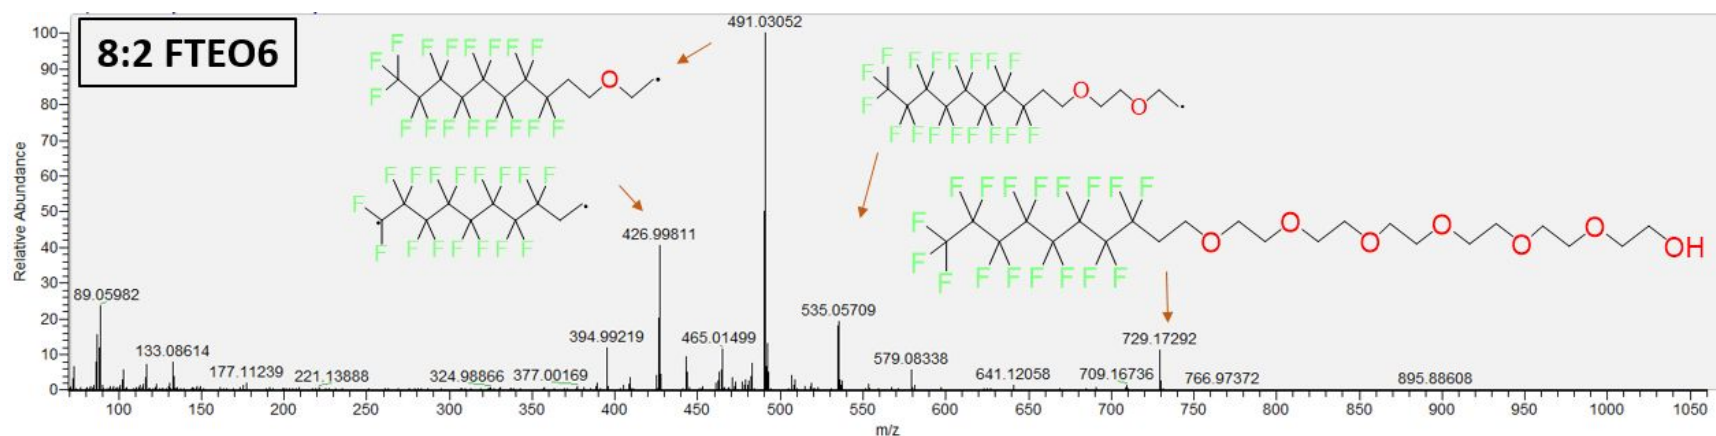

Figure S34: Spectra for 21,21,22,22,23,23,24,24,25,25,26,26,27,27,28,28,28-heptafluoro-3,6,9,12,15,18-hexaoxaoctacosan-1-ol



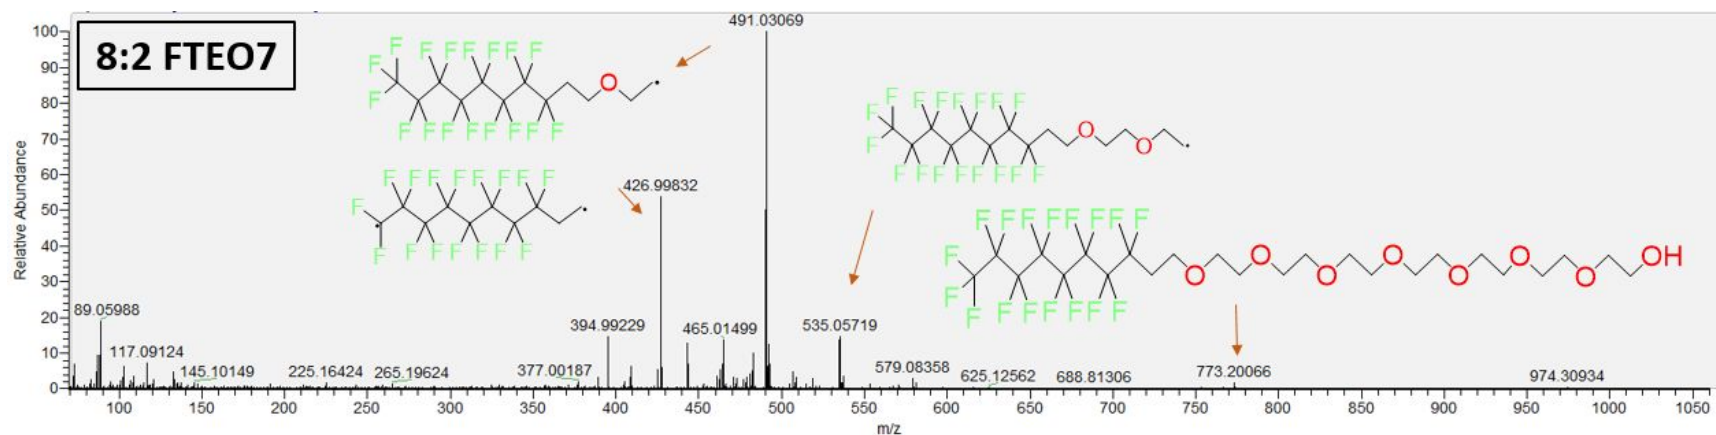

Figure S35: Spectra for 24,24,25,25,26,26,27,27,28,28,29,29,30,30,31,31,31-heptadecafluoro-3,6,9,12,15,18,21-heptaohentriacontan-1-ol

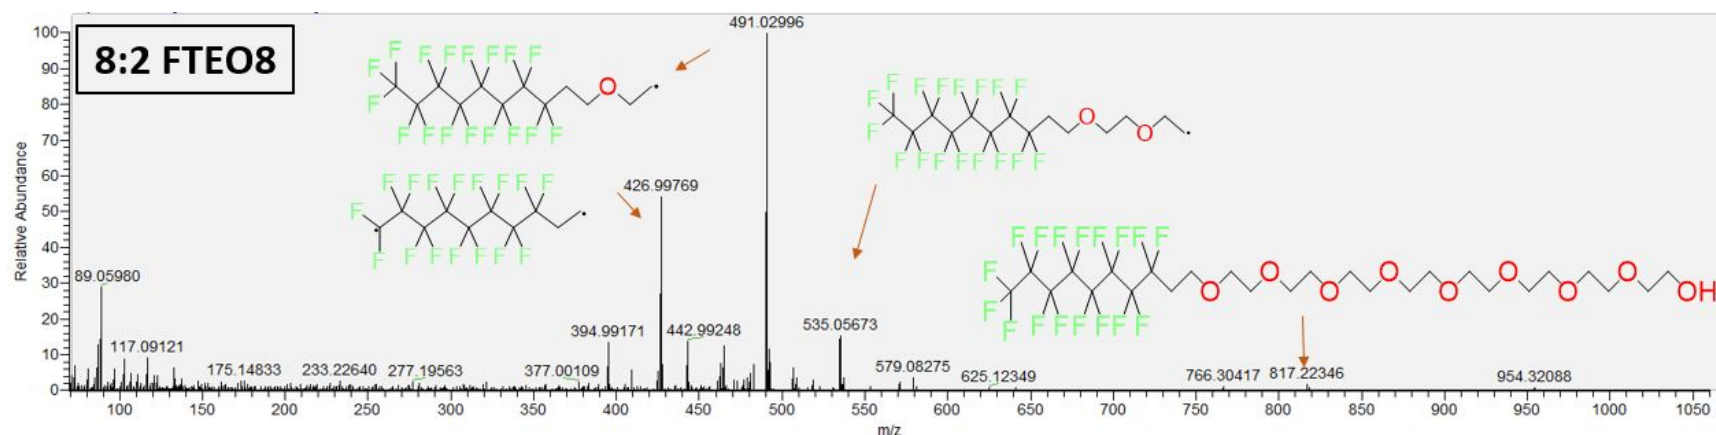

Figure S36: Spectra for 27,27,28,28,29,29,30,30,31,31,32,32,33,33,34,34,34-heptadecafluoro-3,6,9,12,15,18,21,24-octaoxatetriacontan-1-ol

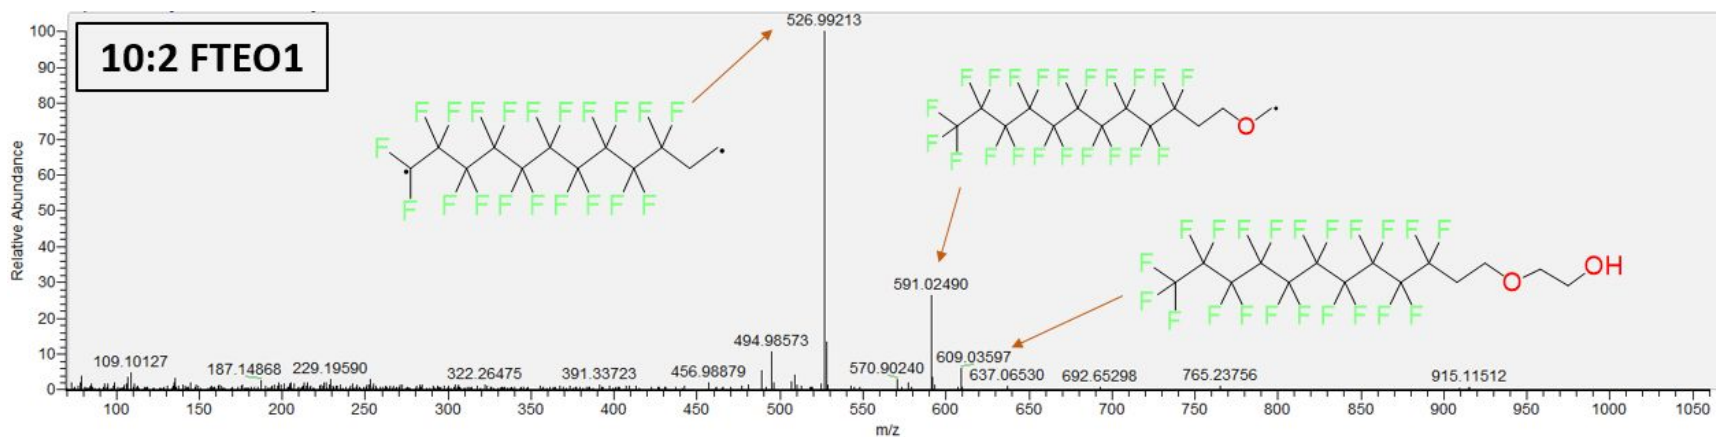

Figure S37: Spectra for 2-((3,3,4,4,5,5,6,6,7,7,8,8,9,9,10,10,11,11,12,12,12-henicosafluorododecyl)oxy)ethan-1-ol

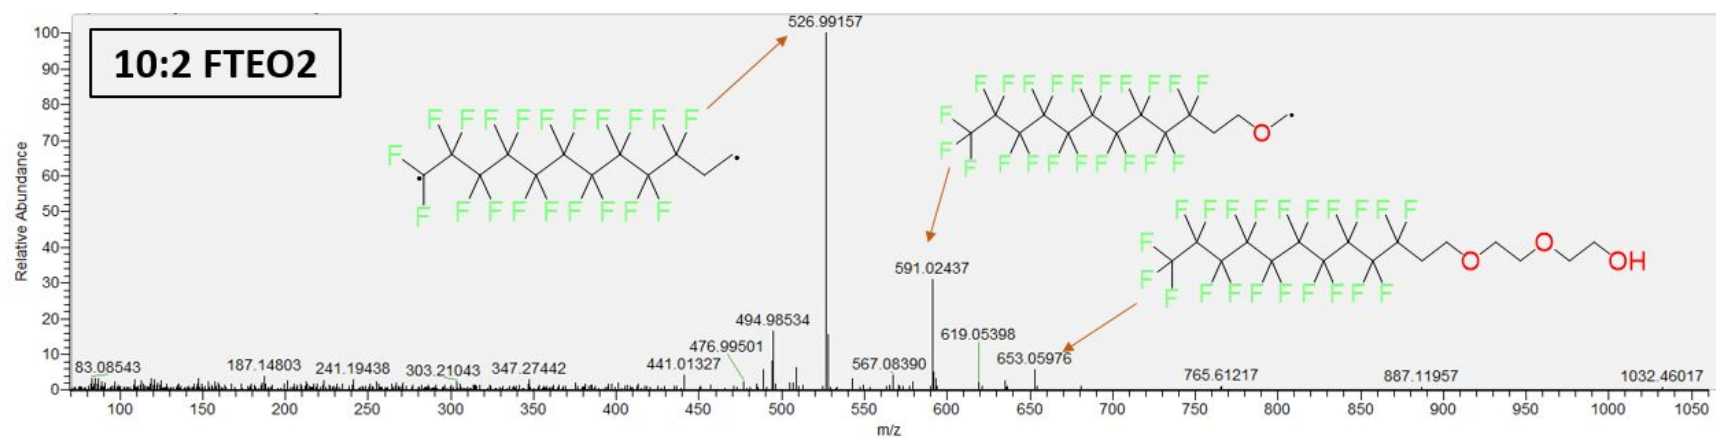

Figure S38: Spectra for 2-(2-((3,3,4,4,5,5,6,6,7,7,8,8,9,9,10,10,11,11,12,12,12-henicosafluorododecyl)oxy)ethoxy)ethan-1-ol

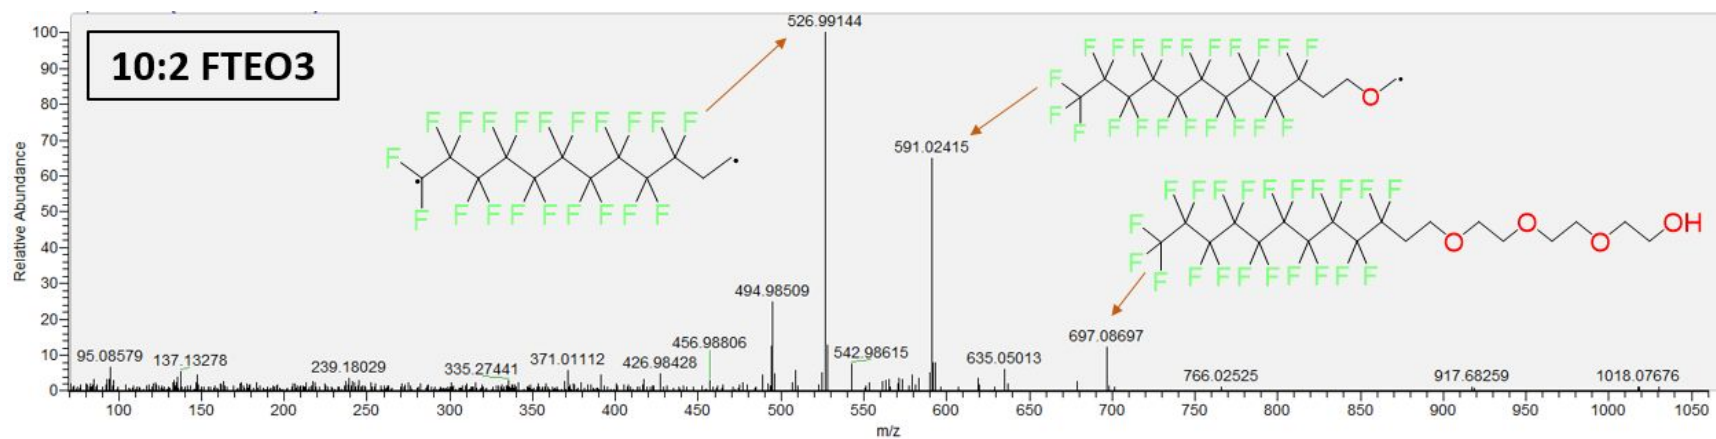

Figure S39: Spectra for 2-(2-(2-((3,3,4,4,5,5,6,6,7,7,8,8,9,9,10,10,11,11,12,12-henicosafuorododecyl)oxy)ethoxy)ethoxy)ethan-1-ol

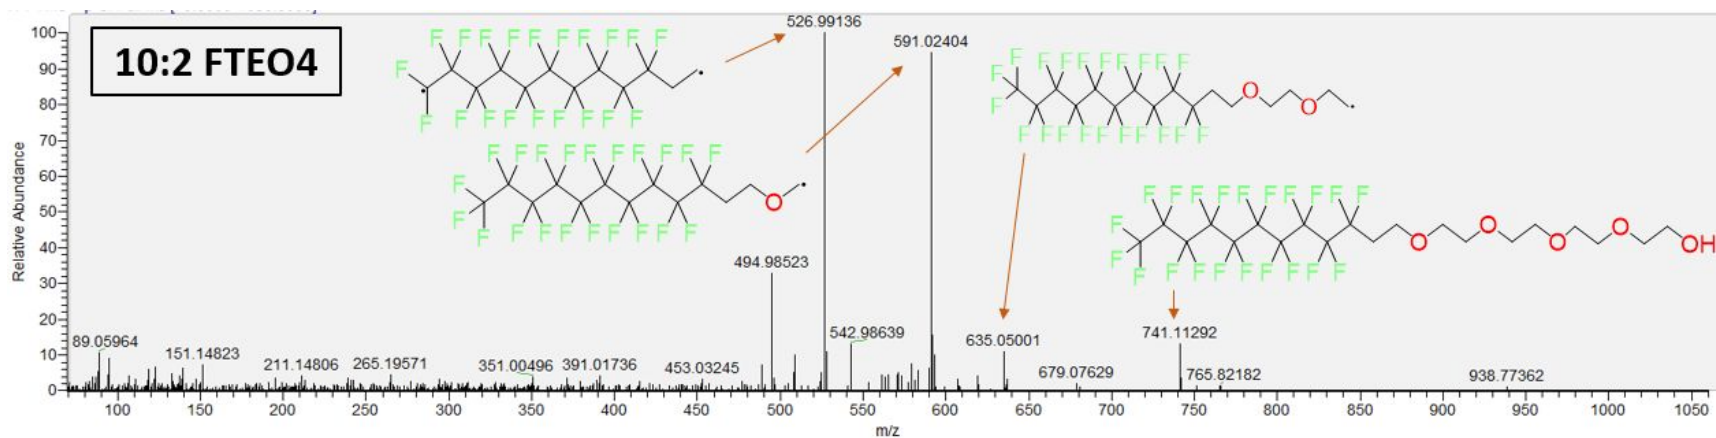

Figure S40: Spectra for 15,15,16,16,17,17,18,18,19,19,20,20,21,21,22,22,23,23,24,24,24-henicosafuoro-3,6,9,12-tetraoxatetracosan-1-ol

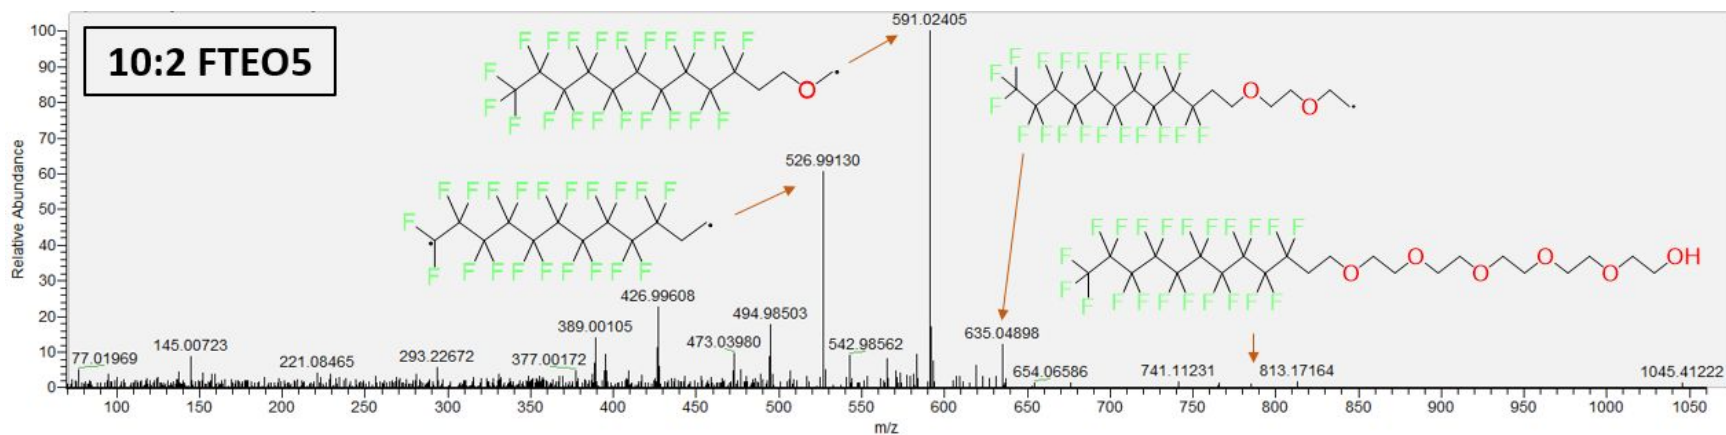

Figure S41: Spectra for 18,18,19,19,20,20,21,21,22,22,23,23,24,24,25,25,26,26,27,27,27-henicosafluoro-3,6,9,12,15-pentaoxaheptacosan-1-ol

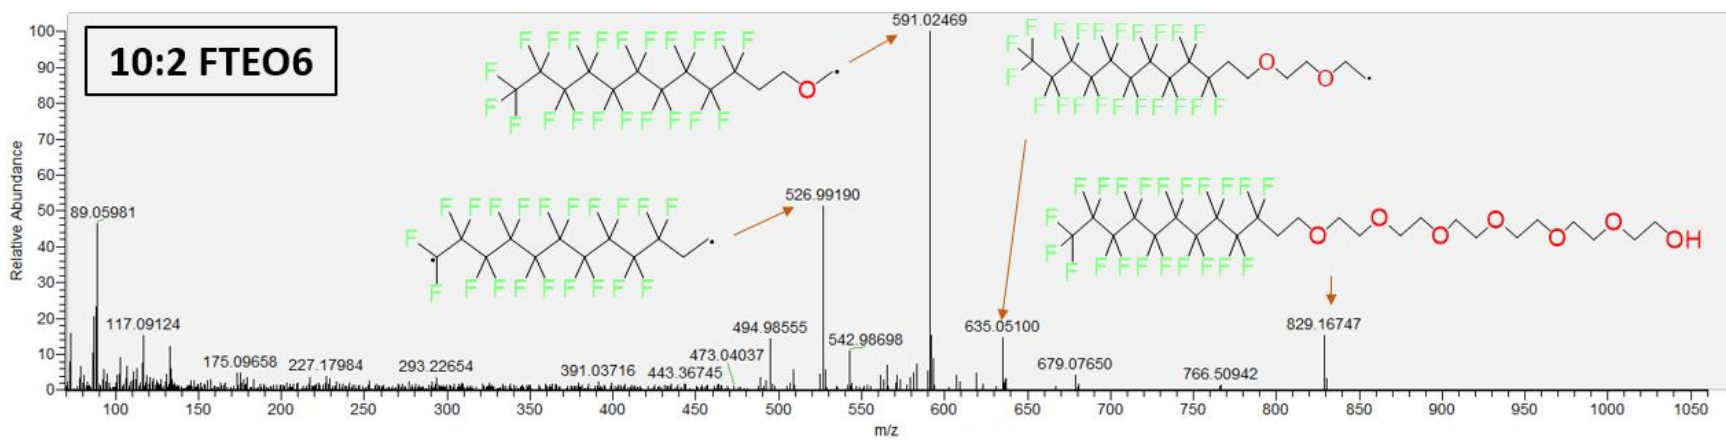

Figure S42: Spectra for 21,21,22,22,23,23,24,24,25,25,26,26,27,27,28,28,29,29,30,30,30-henicosafluoro-3,6,9,12,15,18-hexaoxatriacontan-1-ol



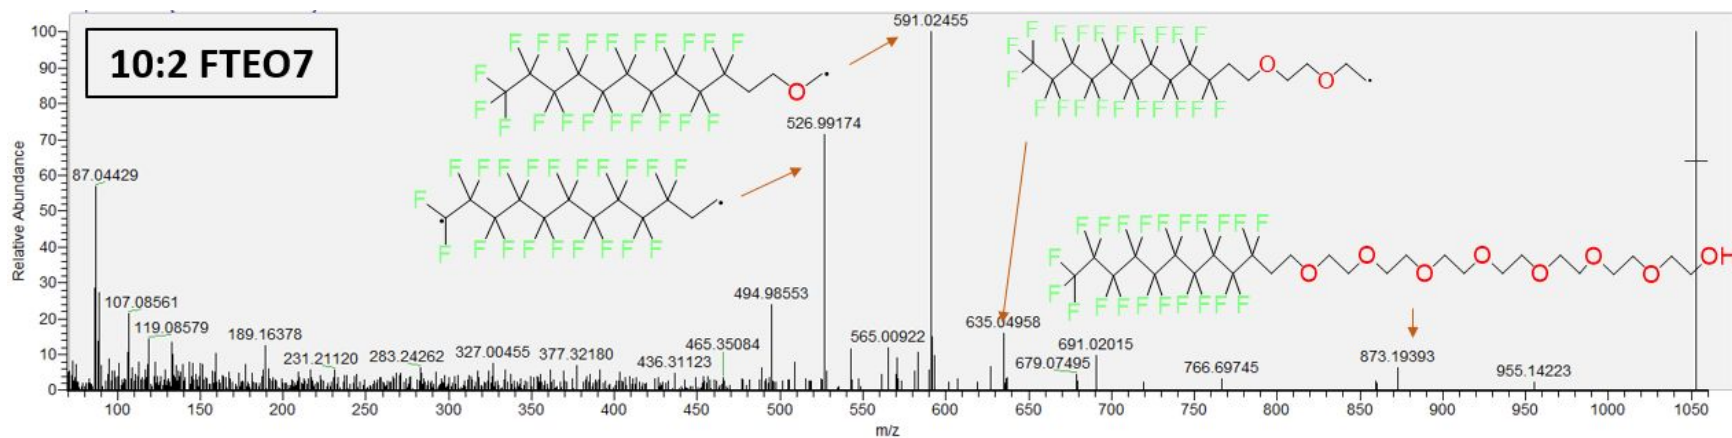

Figure S43: Spectra for 24,24,25,25,26,26,27,27,28,28,29,29,30,30,31,31,32,32,33,33,33-henicosafluoro-3,6,9,12,15,18,21-heptaoxatriacontan-1-ol

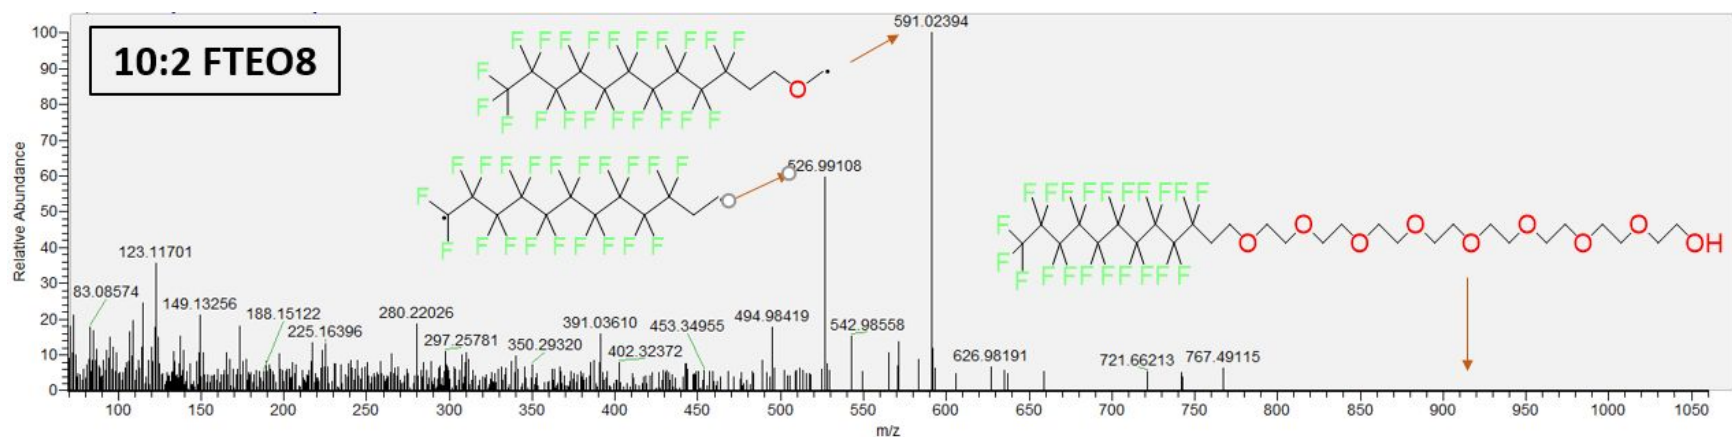

Figure S44: Spectra for 27,27,28,28,29,29,30,30,31,31,32,32,33,33,34,34,35,35,36,36,36-henicosafluoro-3,6,9,12,15,18,21,24-octaoxahexatriacontan-1-ol

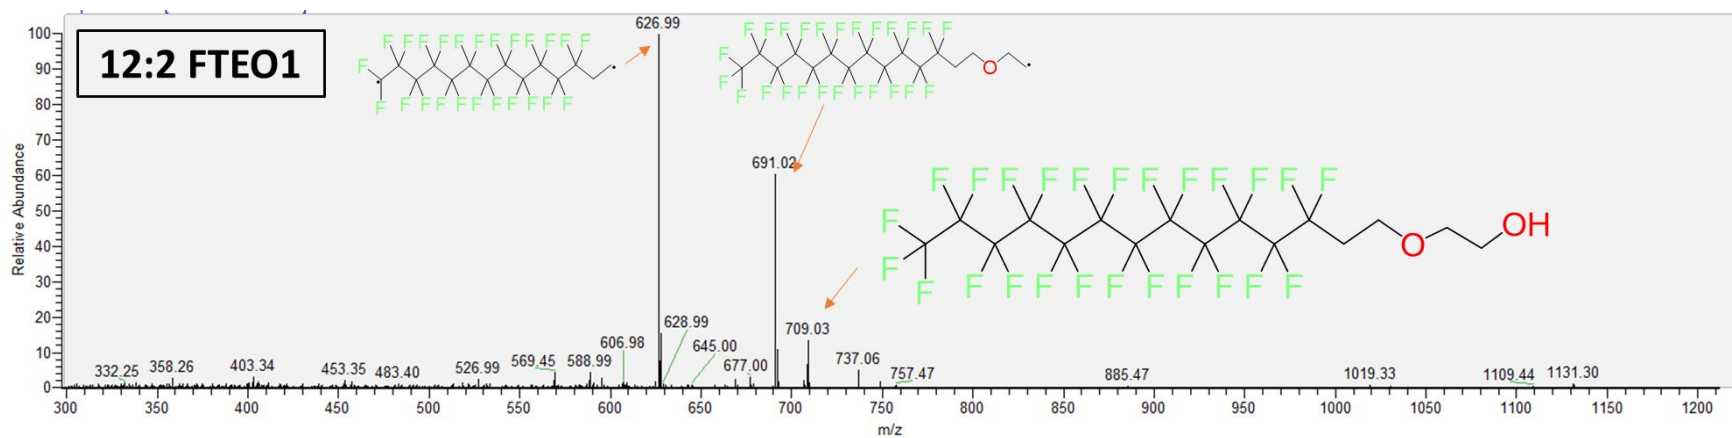

Figure S45: Spectra for 2-((3,3,4,4,5,5,6,6,7,7,8,8,9,9,10,10,11,11,12,12,13,13,14,14,14-pentacosafuorotetradecyl)oxy)ethan-1-ol

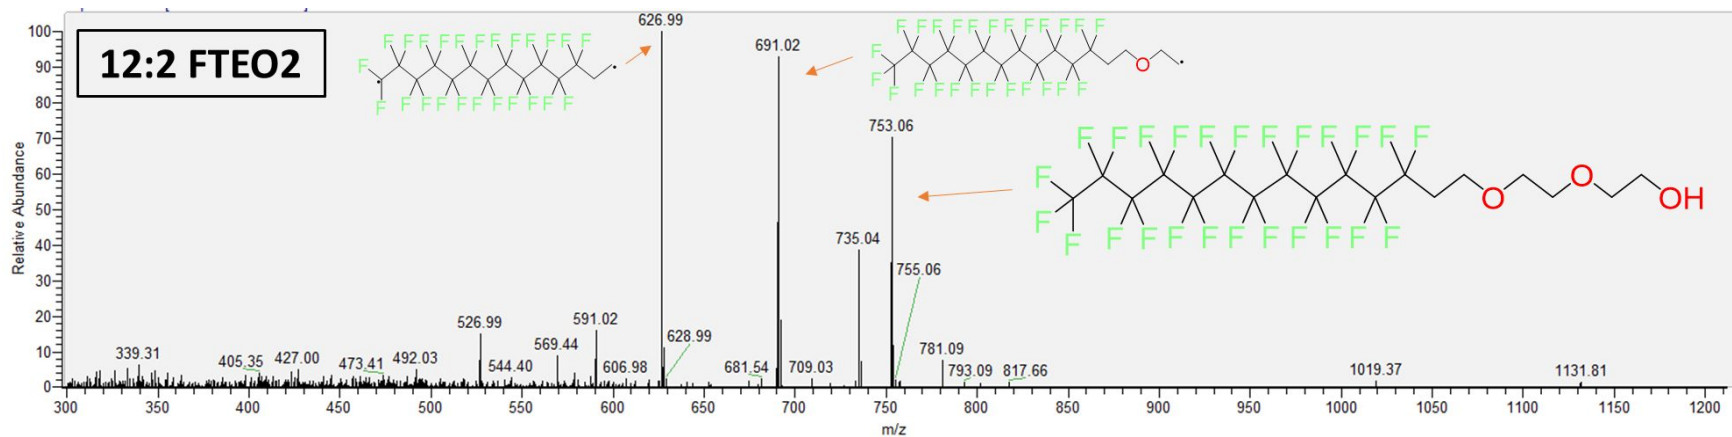

Figure S46: Spectra for 2-(2-((3,3,4,4,5,5,6,6,7,7,8,8,9,9,10,10,11,11,12,12,13,13,14,14,14-pentacosafuorotetradecyl)oxy)ethoxy)ethan-1-ol

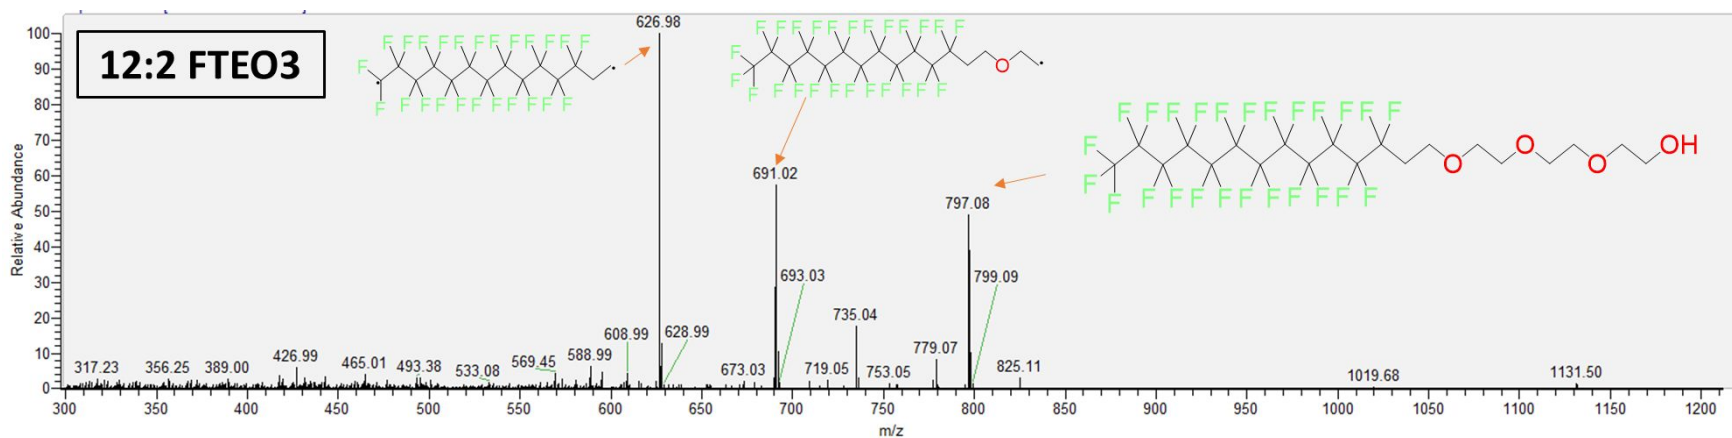

Figure S47: Spectra for 2-(2-(2-((3,3,4,4,5,5,6,6,7,7,8,8,9,9,10,10,11,11,12,12,13,13,14,14,14-pentacosafuorotetradecyl)oxy)ethoxy)ethoxy)ethan-1-ol

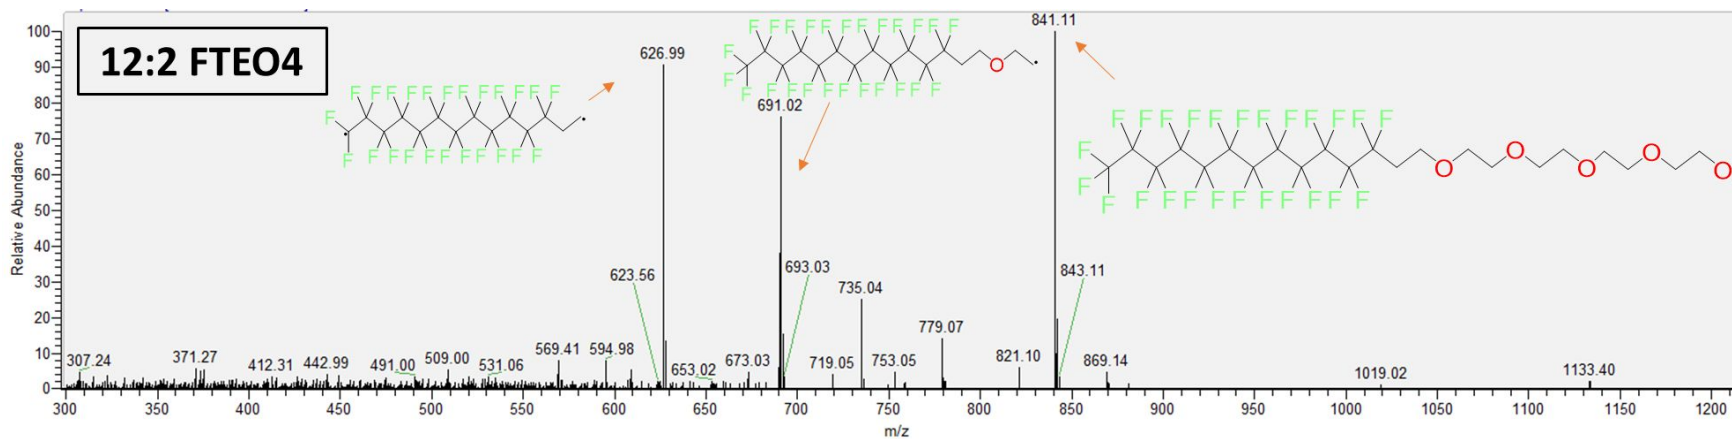

Figure S48: Spectra for 15,15,16,16,17,17,18,18,19,19,20,20,21,21,22,22,23,23,24,24,25,25,26,26,26-pentacosafuoro-3,6,9,12-tetraoxahexacosan-1-ol

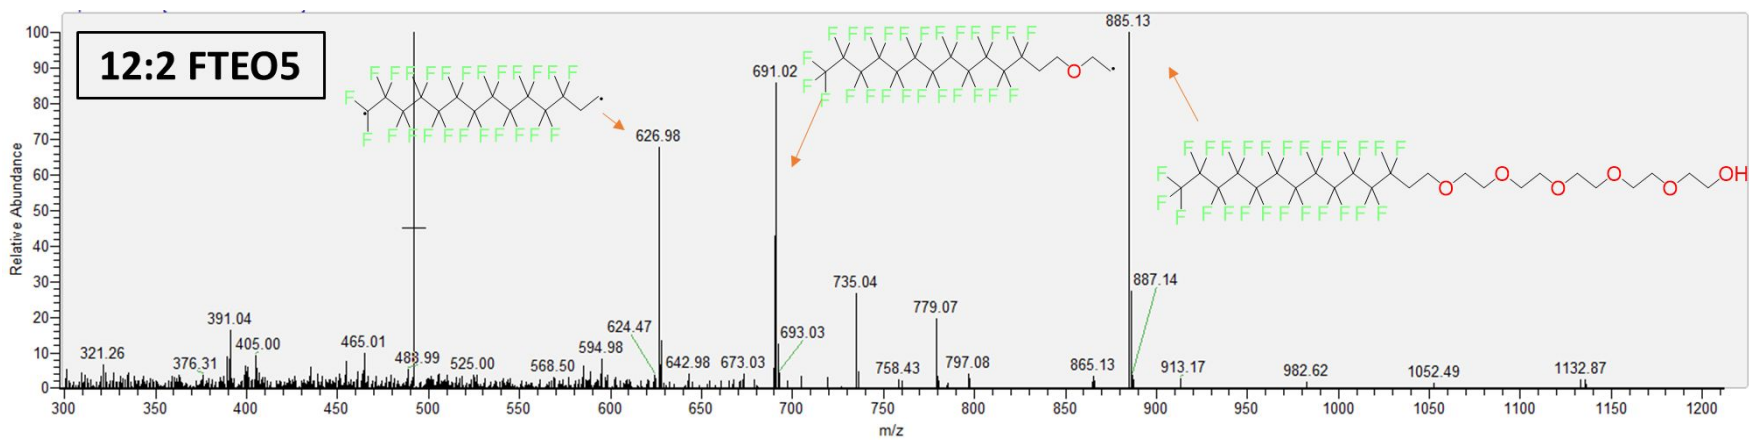

Figure S49: Spectra for 18,18,19,19,20,20,21,21,22,22,23,23,24,24,25,25,26,26,27,27,28,28,29,29,29-pentacosafuoro-3,6,9,12,15-pentaoxanonacosan-1-ol

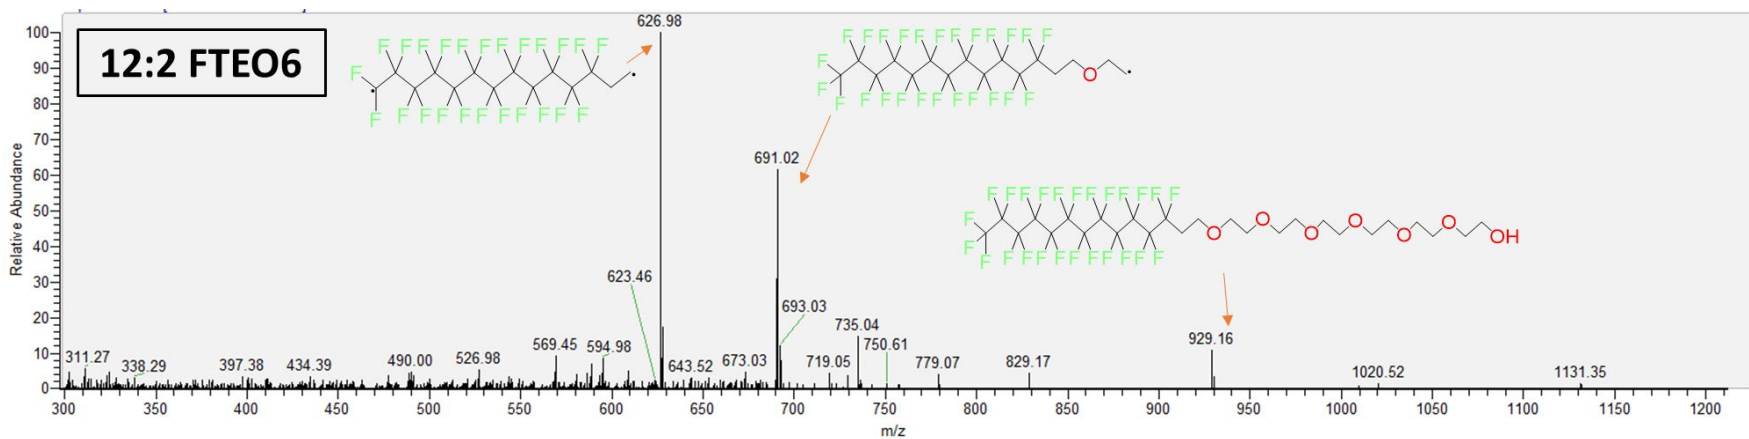

Figure S50: Spectra for 21,21,22,22,23,23,24,24,25,25,26,26,27,27,28,28,29,29,30,30,31,31,32,32,32-pentacosafuoro-3,6,9,12,15,18-hexaoadotriacontan-1-ol

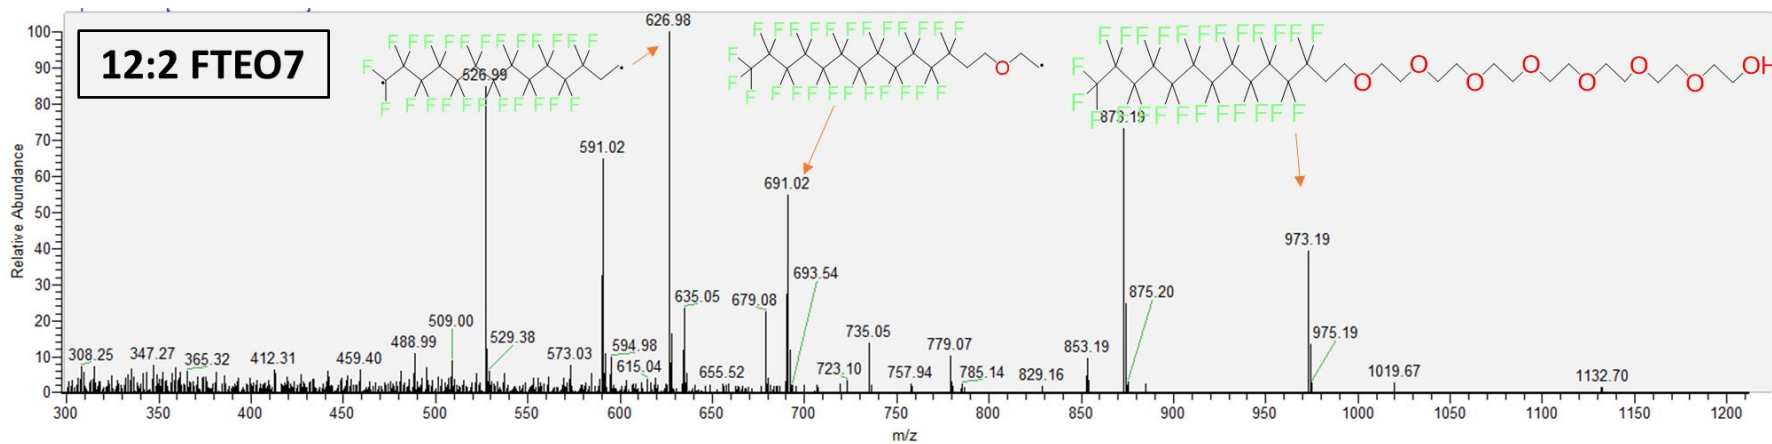

Figure S51: Spectra for 24,24,25,25,26,26,27,27,28,28,29,29,30,30,31,31,32,32,33,33,34,34,35,35,35-pentacosafuoro-3,6,9,12,15,18,21-heptaioxapentatriacontan-1-ol. **Note:** This spectra includes a coelution with 10:2 FTEO7.

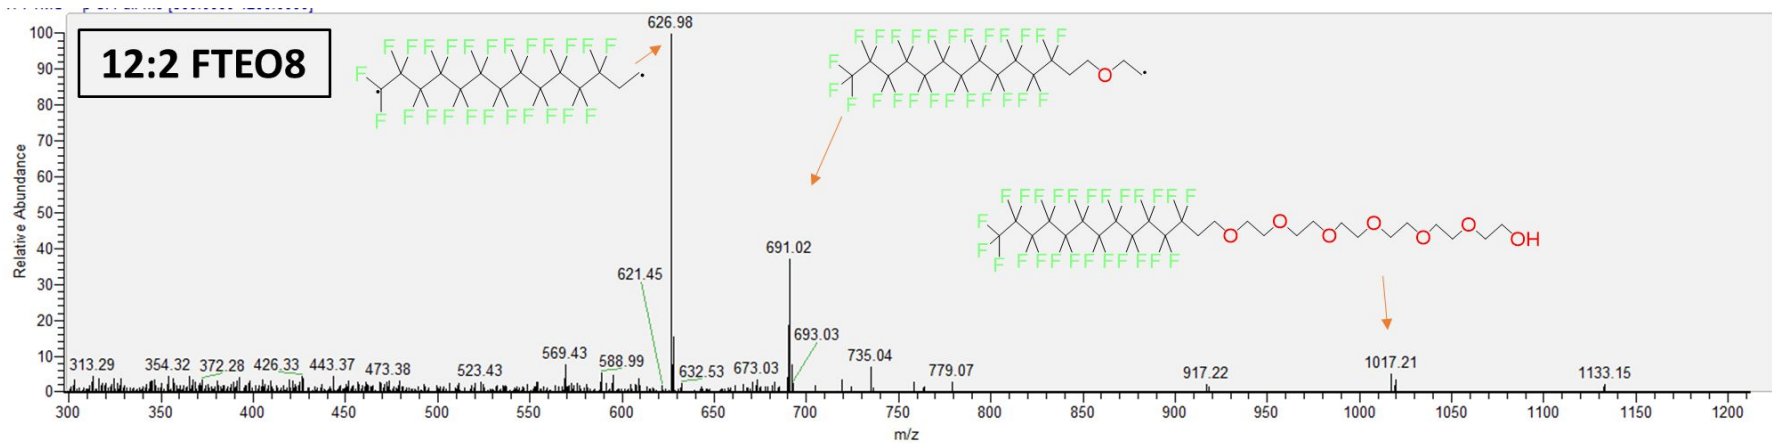

Figure S52: Spectra for 27,27,28,28,29,29,30,30,31,31,32,32,33,33,34,34,35,35,36,36,37,37,38,38,38-pentacosafuoro-3,6,9,12,15,18,21,24-octaoxaoctatriacontan-1-ol
